# 1 Epigenetic feedback on noisy expression 2 boosts evolvability

3 Werner Karl-Gustav Daalman<sup>1</sup> and Liedewij Laan<sup>1,\*</sup>

4

5 <sup>1</sup> Department of Bionanoscience, TU Delft, Delft, the Netherlands

6 \* Corresponding author, e-mail: [L.Laan@tudelft.nl](mailto:L.Laan@tudelft.nl)

7

## 8 Abstract

9 Adapting organisms often face fitness valleys, i.e. barriers imposed by ubiquitous genetic interactions,  
10 while optimizing functions. Elucidating mechanisms that facilitate fitness valley traversals is integral to  
11 understanding evolution. Therefore, we investigated how protein expression noise, mechanistically  
12 decomposed into instant variation and epigenetic inheritance of optimal protein dosage  
13 ('transgenerational feedback'), shapes the fitness landscape. For this purpose, we combined a minimal  
14 model for expression noise with diverse data of *Saccharomyces cerevisiae* from literature on e.g.  
15 expression and fitness to representatively simulate mutational fitness effects. For our proxy of point  
16 mutations, which are very often near-neutral, instant dosage variation by expression noise typically  
17 incurs a 8.7% fitness loss (17% in essential genes) for non-neutral point mutations. However, dosage  
18 feedback mitigates most of this deleterious effect, and additionally extends the time until extinction  
19 when essential gene products are underexpressed. Taken together, we consider dosage feedback as a  
20 relevant example of Waddington's canalization: a mechanism which temporarily drives phenotypes  
21 towards the optimum upon a genetic mismatch, thereby promoting fitness valley traversal and  
22 evolvability.

## 23 Author summary

24 Gene products frequently interact to generate unexpected phenotypes. This universal phenomenon is  
25 known as epistasis, and complicates step-wise evolution to an optimum. Attempts to understand  
26 and/or predict how the optimum is found are further compromised by the countless combinations of  
27 mutations that are considered by nature, and necessitate the formulation of general rules on how the  
28 obstacles that epistasis presents are bridged. To make such a rule as insightful as possible, we reduced  
29 cell division to a generation-based model focusing on one protein at a time for reproductive success.  
30 Importantly, protein production between divisions is stochastic and we show how the resulting  
31 expression noise affects epistasis. After validating the model on experimental fitness landscapes, we  
32 combine high-throughput data of budding yeast from multiple sources to make our model predictions  
33 on mutational effects on fitness as representative as possible. We find different effects per mutation  
34 type: gene duplications have little effect, as genes in our simulated pool are rarely toxic, loss-of-  
35 function mutations decrease mutational gains as adaptation progresses, and point mutations permit  
36 expression noise to unlock its roles in adaptation. For non-neutral point mutations, noise imposes a  
37 sizeable fitness penalty or even induces extinction, which is alleviated by an epigenetic,  
38 transgenerational feedback on protein dosage which is never deleterious. Particularly for essential  
39 genes, we predict that this effect reduces the obstacles of epistasis and hence significantly increases  
40 evolvability, adding to the general rules of evolution.

## 41 Introduction

42 The ability to predict evolution has a plethora of societal applications. For example, tracking and  
43 forecasting viral evolution benefits vaccination strategies (Du, King, Woods, & Pascual, 2017; Neher &  
44 Bedford, 2015), efforts in rational design and directed evolution of microbial communities will improve  
45 chemical production and many aspects of daily life (Sanchez et al., 2020; Zomorodi & Segrè, 2016),  
46 and research on evolutionary models provides better grip on diseases such as cancer (Diaz-Uriarte &  
47 Vasallo, 2019). However, several confounding phenomena complicate our understanding of evolution.  
48 One of those is expression noise, i.e. variation in dosage of gene products across an isogenic  
49 population. Another example is epistasis (e.g., (Bank, Matuszewski, Hietpas, & Jensen, 2016; Miton &  
50 Tokuriki, 2016; Sailer & Harms, 2017)), i.e. the observation that mutational effects can depend on the  
51 particular genetic background in terms of magnitude and sign, which causes the adaptive fitness  
52 landscape to have non-trivial shapes. Here we ask how expression noise and epistasis mechanistically  
53 intertwine, to ultimately improve our understanding and accurate prediction of evolution.

54 Previous research has primarily focused on the consequences of noise given a certain fitness  
55 landscape, with ambiguous conclusions. On the one hand, noise can drive a population away from the  
56 optimal equilibrium, while on the other hand, noise can also function as a bet-hedging strategy (Philippi  
57 & Seger, 1989). This ambiguity also holds for the particular case of expression noise. Theoretically,  
58 expression noise can influence environmental robustness (Mineta, Matsumoto, Osada, & Araki, 2015),  
59 but it can also decrease the effective population size and increase drift (Wang & Zhang, 2011). By the  
60 same token, there is empirical evidence that expression noise has both been selected for as well as  
61 selected against in the evolution of *Saccharomyces cerevisiae* (Fraser, Hirsh, Giaever, Kumm, & Eisen,  
62 2004; Z. Zhang, Qian, & Zhang, 2009).

63 Equally interesting is how noise shapes the fitness landscape itself. While theoretically important  
64 (Coomer, Ham, & Stumpf, 2022), the empirical relevance of this noise interaction has been much less  
65 intensively studied thus far. Epistasis is a natural property of fitness landscapes for noise to interact

66 with, as it is universally found across many organisms (Sanjuán & Elena, 2006). For example, changes  
67 in expression are expected to be a common source of (sign) epistasis (Li, Lalić, Baeza-Centurion, Dhar,  
68 & Lehner, 2019). This epistasis (see conceptually in Figure 1A) is particularly important for essential  
69 genes. As essentiality is increasingly found to be context-dependent (Larrimore & Rancati, 2019),  
70 epistasis and its link to noise are highly relevant for adaptation. Another example of ubiquitous  
71 negative epistasis is diminishing returns, i.e. mutations becoming less beneficial as fitness increases,  
72 which has been shown in model systems such as *Methylobacterium extorquens* (Chou, Chiu, Delaney,  
73 Segrè, & Marx, 2011), *Escherichia coli* (Khan, Dinh, Schneider, Lenski, & Cooper, 2011), *S. cerevisiae*  
74 (Kvitek & Sherlock, 2011) and a multicellular fungus (Schoustra, Hwang, Krug, & de Visser, 2016). The  
75 generality of diminishing returns epistasis across unrelated biological modules (Kryazhimskiy, Rice,  
76 Jerison, & Desai, 2014) naively suggests the existence of generic causes. As variation in protein dosage  
77 is known to couple otherwise unrelated modules (Kleijn, Krah, & Hermsen, 2018), a possible hypothesis  
78 is that expression noise generically affects epistasis and thereby the shape of the fitness landscape.

79

80 In this paper, we will study how the interaction between noise and fitness landscapes feeds back on  
81 epistasis, differentiating between genetic and epigenetic contributions of noise. For this purpose, we  
82 construct a minimal cell model to understand how noise shapes fitness landscapes and mutational  
83 effects therein, decomposed by mutational type and noise mechanism. This minimal model focusses  
84 on a single gene product stochastically switching between two dosage states, which determine the  
85 progeny per cell. First, we explore theoretically how the evolutionary roles of noise relate to two  
86 distinct noise mechanisms, namely generating instantaneous variation in protein dosage and an  
87 epigenetic feedback on dosage. Then, we integrate literature data of *S. cerevisiae* on for example  
88 empirical fitness landscapes and the distribution of mutational effects, to generate a representative  
89 estimate of the pattern of epistasis for e.g. promoter mutations and duplications. We find that an  
90 simple epigenetic feedback biases dosage with every generation to cause expression noise to

91 significantly mitigate the fitness penalties associated with instant variation, particularly for essential  
92 genes. Furthermore, the feedback also promotes longer survival before extinction when gene products  
93 are on average at a lethal dosage. We conjecture that this noise-based epigenetic feedback is  
94 important for the evolvability of many essential genes across organisms, suggesting a general rule on  
95 how expression noise acts as a fitness landscaper. Consequently, feedback emerges as a canalization  
96 mechanism in the context of evolutionary theories.

## 97 Model methods

### 98 Construction of a minimal model for epistasis and noise

99 To elucidate the mechanistic coupling of noise to fitness landscapes, we make a minimal model for  
100 epistasis subject to noise (MEN-model), depicted in Figure 1D. The minimality of this model has the  
101 benefit of tractability and also accommodates the seemingly generic nature behind epistasis-noise  
102 coupling by disregarding many biological details. The latter justifies coarse-graining the underlying  
103 protein interactions and reducing the cellular environment to one protein under consideration at a  
104 time.

105 We model a population of cells containing a protein  $X$ , with fitness  $\omega$  defined as the reciprocal of the  
106 population doubling time (see also Model implementation details). In short, we disregard degradation  
107 and dilution, and the constant cell size permits interchangeable use of protein number and  
108 concentration. The cell cycle is simplified to two stages: first,  $X$  is produced stochastically, proportional  
109 to the cell cycle duration  $T$ . After this time, each cell is replaced by two cells which inherit  $X$  evenly, of  
110 which the progeny number  $g$  (between 0 and 2) survive. We assume the progeny scales with the  
111 available concentration  $[X]$ , which is parametrized as a Hill curve (for example as in Figure 1B), where  
112  $d$  modulates the difference between the best and worst progeny state:

$$g([X]) = d + \frac{2 - d}{1 + ([X]/c)^{-k}} \quad (1)$$

113 The Hill equation loosely permits the generic interpretation of X being involved in cooperative binding  
 114 (with some caution (Prinz, 2010)) or switching between activation states (e.g., by phosphorylation).  
 115 This defines  $c$  as a tipping point concentration and  $|k|$  as an effective cooperativity coefficient,  
 116 resulting from coarse-graining the full chemical pathway involving X.

117 After division, X is binned into two dosages, either low or high with respect to  $c$ , and therefore we only  
 118 evaluate the progeny function  $g$  at  $2c/3$  and  $4c/3$ , with values defined as  $g_l$  and  $g_h$  respectively.  
 119 Consequently, the stochastic production of X forms a two-state discrete time stationary Markov chain,  
 120 where every time step is a generation. Coefficients in the transition matrix  $M$  denote switching  
 121 probabilities following from the cumulative distribution function (cdf)  $F_e(x; \mu, V)$  governing expression,  
 122 with  $x$  as the added protein and the parameters  $\mu$  as mean expression and  $V$  as noise level. We only  
 123 require the cdf at  $x = 2c/3$  and  $4c/3$ , whose values we define as  $F_h$  and  $F_l$  respectively (see Figure 1C).  
 124 This yields state vector  $f$ , whose entries represent the number of cells in the high state ( $f_h$ ) or low state  
 125 ( $f_l$ ) respectively:

$$\begin{bmatrix} f_h \\ f_l \end{bmatrix} \Big|_{t=T} = \begin{bmatrix} g_h(1 - F_l) & g_h(1 - F_h) \\ g_l F_l & g_l F_h \end{bmatrix} \begin{bmatrix} f_h \\ f_l \end{bmatrix} \Big|_{t=0} \equiv Mf|_{t=0} \quad (2)$$

$$\omega = \frac{\log_2 \lambda_{max}}{T} \quad (3)$$

126 where  $\lambda_{max}$  is the largest eigenvalue of  $M$  and  $\omega$  is the fitness at equilibrium, which we can multiply by  
 127  $T$  to obtain the relative fitness  $\omega_r$ . Conveniently, our fitness is in reasonable accordance with the fit  
 128 function postulated in (Keren et al., 2016), so we can straightforwardly compare the two fit results (see  
 129 MEN-model fitness comparison with literature). We note that our model provides a parsimonious and

130 interpretable alternative on the originally postulated fit function, improving on 84% of the landscape  
131 data (see Appendix 1-figure 1).

## 132 Decomposition of noise into variation and feedback

133 We distinguish two noise contributions. Firstly, instant variation generates different dosages within  
134 each cycle. Additionally, as some cells have a dosage that allows more progeny, and since dosage is  
135 heritable, this results in an epigenetic bias towards the favorable dosage unless protein life-times are  
136 very short. We can refer to this as a transgenerational feedback of protein dosage after (Xue & Leibler,  
137 2016), only with respect to a genetic rather than a physical environment.

138 We implement the *absence* of feedback into the model by resetting the distribution of cells across the  
139 two states after every division (see Figure 1D), countering the effect of selection. We redistribute the  
140 cells across the two states according to the state proportions when selection is absent, so when  $g_h = g_l$   
141 = 2 in equation 2. This feedback has a strictly non-negative effect (see Appendix) on fitness or  
142 exponential decay of the population ( $\lambda_{max} < 1$ ). The relative fitness is given by:

$$\omega_{r,-tgf} = \log_2 \left( \frac{g_h(1 - F_h) + g_l F_l}{1 - F_h + F_l} \right) \quad (4)$$

143

## 144 Generation of distributions of fitness effects (DFEs)

145 To simulate the effects of mutations on fitness in populations in the MEN-model, we incorporate  
146 mutations into the model in two ways. Firstly, we consider expression mutations that affect the mean  
147 of the distribution underlying  $F_e(x; \mu, V)$ . Mutations that affect fitness otherwise are incorporated as a  
148 generic effect on cycle time  $T$ . Because a change in cell cycle time  $T$  also affects mean expression, these  
149 generic mutations can couple to expression in an unrelated module, akin to (Kleijn et al., 2018).  
150 Combining these mutation types, we examine the distribution of fitness effects (DFEs) by expression  
151 mutations in different stages of adaptation by varying the cycle time through the generic mutations.

152 It is possible to link the simulated mutations considered above to many concrete mutations, which  
153 induce an effective change in mean expression. Apart from the trivial case of synonymous  
154 substitutions, this category includes promoter mutations, duplications, deletions or premature stops,  
155 mutations that affect reaction rates involving protein X that lead to an effective change in amount of  
156 available X, mutations that change mRNA stability, mRNA lifetime or protein half-life, but also 5'UTR  
157 mutations and RBS mutations influence expression (Kosuri et al., 2013; Mutalik et al., 2013). Expression  
158 related mutations form a significant part of the adaptive mutations in evolutionary trajectories of *S.*  
159 *cerevisiae* (Kryazhimskiy et al., 2014). It is even plausible that our modelled expression related  
160 mutations encompass synonymous mutations that affect fitness (Shen, Song, Li, & Zhang, 2022).

## 161 Results

### 162 Noise theoretically delays extinction, feedback compensates fitness loss

163 In order to provide more intuition about possible fitness landscapes, we first formulate some  
164 expectation based on a theoretical analysis of the MEN-model, before applying the model to realistic  
165 mutational scenarios. In Figure 2, we consider the two extreme situations: the essential (lethal when  
166 underexpressed) and toxic (lethal when overexpressed) landscapes. We assume very sharp Hill curves  
167 (high effective cooperativities,  $k \gg 1$ ) in both cases, and an initial population size of 1 million which is  
168 only relevant when the population is exponentially decaying. Three roles of noise immediately emerge,  
169 which we can decompose into the two aspects of noise: instant variation and epigenetic feedback.

170

171 Firstly, noise smoothens the fitness landscape. For expression levels where the fitness can be defined  
172 (blue to green colors), increasing noise increases the span of the color gradient. Analogously, the  
173 number of generations a population can temporarily survive (red to purple colors) when expression is  
174 structurally insufficient or too high, also exhibits a shallower gradient at higher noise levels. We see  
175 this smoothing effect with and without feedback, although it is theoretically expected to be slightly



176 more pronounced with feedback unless the landscape is relatively flat (see Figure 2-figure supplement  
177 2).

178 Secondly, increased noise has a dual effect on fitness. For the essential gene landscape, we see fitness  
179 decrease with the addition of noise, in correspondence with the notion that noise drives the  
180 population away from equilibrium. By contrast, in the toxic gene landscape, noise can actually improve  
181 fitness. However, we will see later that in practice, this beneficial role of noise will be rare. The  
182 feedback has no effect on the reversal from a negative to positive effect on fitness depending on  
183 landscape shape. The cause for this reversal is instant variation.

184 Thirdly, we see a widespread role for noise to improve temporary survival. When expression is  
185 insufficient to sustain the population, population size will instead shrink exponentially with every  
186 generation. The number of generations it takes for the population to go extinct is important for  
187 evolution. For example, an environmental perturbation may render a population with a certain  
188 genotype inviable, causing a population shrinkage with time/generations. In the case of budding yeast,  
189 a large inviable population may also arise from sporulation. As the population decays, it can only evade  
190 extinction if it finds a genetic mutation that returns the population to the viable expression regime.  
191 We see noise conveniently increases the number of generations until extinction and thereby the time  
192 available for a compensatory mutation to occur. The diversifying and buffering potential of noise is not  
193 released in one moment, but is replenished continuously. Again, we see this effect with and without  
194 feedback.

195 Despite qualitative similarities between scenarios with and without feedback, an important function  
196 surfaces for the transgenerational feedback on protein dosage. Comparing the two plots in the top  
197 row of Figure 2 to those in the bottom row, we see that deleting the memory of the system causes  
198 several deleterious effects on the population: (i) for expression levels where a fitness can be defined,  
199 the fitness is decreased; (ii) the viability edge, the expression threshold for which the population can  
200 structurally sustain its survival, also shifts to a disadvantageous direction; (iii) the number of survivable

201 generations beyond the viability edge is decreased. So, although the feedback does not yield  
202 qualitatively different behavior for the effect of noise on fitness, there are noticeable quantitative  
203 effects on fitness. We reiterate that these quantitative effects of the feedback are never deleterious  
204 (see Strict non-negativity of transgenerational feedback effect on fitness). We also note that this  
205 feedback requires a minimal amount of noise at any finite population size to sustain dosage memory  
206 inside the population in practice, as marked by the discontinuity in e.g. the viability edge. However,  
207 given the feasible region in (Chong et al., 2015) of  $0.1 < V < 1$ , we can safely ignore this exception.

## 208 [Translation to realistic mutational landscapes](#)

### 209 [Validation of MEN-model fits](#)

210 After forming theoretical expectations, we validate the MEN-model as part of our translation to  
211 realistic mutational scenarios in yeast by evaluating model fits, for estimates of the parameters  $k$ ,  $c$ ,  $d$   
212 and  $V$  on empirical fitness landscapes (Keren et al., 2016) (see also Materials and Methods section and  
213 SI: Evaluation MEN-model fits on empirical fitness landscapes). These landscapes are combined with  
214 WT dosage data (Kulak, Pichler, Paron, Nagaraj, & Mann, 2014) and essentiality data (Cherry et al.,  
215 2012). Compared to the original fits of (Keren et al., 2016), our model fits are improvements in 84% of  
216 the cases (metric  $R^2$  adjusted for the free parameters (Wherry, 1931)), see Appendix 1-figure 1A.

217 However, despite the quality of the fits, the interpretation of parameters should be approached with  
218 care. The Hill curve for the progeny function suggests the interpretation of  $k$  as a Hill coefficient, which  
219 in turn can represent allostery (e.g., (Prinz, 2010)). Yet, if we define a feasible allosteric range of  $|k| \leq$   
220 5 for simple reactions, that means that many of the inferred  $k$ 's fall outside this reasonable regime  
221 (Appendix 1-figure 1C). This suggests that a generic reaction form involving protein X assumed is  
222 probably too simplistic for most gene products considered. The observed ultrasensitivity suggests  
223 more subtle underlying processes, such as feedback loops or multiple phosphorylation steps to  
224 activate one protein (Ferrell & Ha, 2014a, 2014b; Ferrell, Jr, & Ha, 2014), or weak multivalent binding  
225 (Curk, 2016).

## 226 Simulation of mutations and DFEs

227 To construct realistic model predictions for mutational returns, we construct a representative gene  
228 pool based on the aforementioned landscape fits (see Figure 3A, Figure 3-figure supplement 1A and  
229 the Materials and Methods section). The fitness landscapes pool is consistent with the observation  
230 that most genes are non-neutral and mostly affect fitness at low expression (Keren et al., 2016), and  
231 by design that around 19% of genes are essential (Giaever et al., 2002). We also consider this gene  
232 pool in various phases of adaptation, by setting a range of cycle times  $T$  to generate diversity in  
233 background fitness values. We can then also assess whether the coupling of noise and epistasis also  
234 depends on background fitness, e.g., whether the simulated mutations follow a diminishing return  
235 pattern.

236 Given our synthetic gene pool, we consider three noise scenarios: (1) with instant variation and  
237 epigenetic feedback, (2) with variation only and (3) completely without noise. These scenarios allow  
238 for mechanistic decomposition of the mutational effects. Within these scenarios, we impose three  
239 different mutation types to generate distributions of fitness effects (DFEs), which comprise the  
240 collection of effects of single mutations in one gene at a time for various values of background fitness.  
241 Each type has its own distribution of mutational effects (DME) on gene expression underlying protein  
242 X. The mutation types are point mutations, indels/loss-of-function mutations and duplications. The  
243 former two are common functional mutations in yeast adaptation (Kryazhimskiy et al., 2014), the latter  
244 two are relevant in evolution of many organisms (Murray, 2020; J. Zhang, 2003), such as fungi  
245 (Wapinski, Pfeffer, Friedman, & Regev, 2007), *Caenorhabditis elegans* (Farslow et al., 2015), and plants  
246 (Panchy, Lehti-Shiu, & Shiu, 2016).

247 Firstly, we obtain representative point mutations from re-analyzing the data (see Materials and  
248 Methods section) on the DMEs from (Hodgins-Davis, Duveau, Walker, & Wittkopp, 2019a, 2019b),  
249 where point mutations were randomly chemically induced to shift expression levels of a gene of  
250 interest. While based on only 10 lines, the similarity of the DMEs across lines (unimodality, centered

251 around WT expression) suggests this data set is sufficiently representative. The average DME (Figure  
252 3-figure supplement 1C) then allows translation of the landscape as function of expression to a  
253 simulated DFE, as function of background fitness. Secondly, the deletions and duplications define an  
254 effective expression at zero and twice the original expression. Although indels trivially have the same  
255 results with and without noise, we included these in our simulations for an additional validation step  
256 (see Simulated DFE comparison to documented diminishing returns), motivating our somewhat  
257 arbitrary choice of setting neutrality at  $\leq 0.4\%$  fitness effect.

258

### 259 [Variation generates non-neutrality, feedback recovers most fitness losses for](#) 260 [representative mutants](#)

261 Our earlier theoretical analysis suggested three possible roles of noise: landscape smoothing,  
262 extinction delay and, for feedback in particular, recovery of fitness losses. Regarding the first point, we  
263 consider the percentage of non-neutral mutations in Figure 3B, which should be larger for smoother  
264 landscapes. With noise (circles), the simulations of representative mutations exhibit a large abundance  
265 of neutral mutations, 99.5 and 97.4% of point mutations (purple) and duplications (green) respectively.  
266 This can be attributed to point mutations causing mainly small expression shifts (see Figure 3-figure  
267 supplement 1C) and to toxicity being rare (see Figure 3-figure supplement 1B) respectively. The  
268 average mutational effects are also smaller compared to the impactful deletions which are usually non-  
269 neutral (see also see Figure 3-figure supplement 1B) but for which noise is trivially irrelevant.

270 However, without noise (crosses) the percentage of non-neutral mutations plummets about 12-fold  
271 and 2.5-fold respectively, yet simultaneously the average mutational effect increases. The loss of  
272 instant variation is the predominant cause of this shift, as without feedback (triangles) mutational  
273 effects are fairly similar. The instant variation hence generates the noise-driven non-neutrality.  
274 Although we theoretically expected more landscape smoothing of the presence of feedback (see Figure  
275 2-figure supplement 2), the aforementioned narrow point mutation DME and rare toxicity mean most

276 non-neutral mutations occur within the relatively narrow part of the landscape, which is smoothed  
277 in absence of feedback.

278 By contrast, we confirm a higher degree of smoothing for essential gene profiles (see Figure 3-figure  
279 supplement 2). This translates to a higher percentage of non-neutral mutations for essential genes  
280 than for non-essential genes. If we extrapolate the percentage of non-neutral mutations to a higher  
281 likelihood of protein X having a genetic interaction affecting expression, this suggests that noise  
282 naturally grants essential genes with more interactors. This effect is consistent with the empirical  
283 observation that essential genes have about 80% more interactors (see Materials and Methods,  
284 [Cherry et al., 2012; Stark et al., 2006]), and that essential genes are more likely to have a hub function  
285 (H. Yu, Greenbaum, Lu, Zhu, & Gerstein, 2004). Noise can then be seen as a generator of epistasis.

286 Expanding on the coupling of noise and epistasis, we bin the mutations per background fitness and  
287 determine whether we obtain a positive or negative dependency of the mean fitness effect with  
288 background fitness. Surprisingly, the point mutation DFEs show increasing rather than diminishing  
289 returns, an effect that is fully attributable to instant variation (see Appendix 1-figure 2). For  
290 duplications, the effects are much more subtle, and for indels where noise has no roles, we retrieved  
291 the documented diminishing returns with reasonable accuracy.

292 For the second role of noise regarding extinction, we focus on point mutations, considering the rarity  
293 of toxic genes. The non-neutral point mutations can be divided into three situations (see Figure 4A):  
294 most of the time (in 84% of the non-neutral mutations), the feedback is not critical for viability, in 14%  
295 of the cases the feedback is essential and for 1.7% of these mutations, the population will always decay  
296 exponentially. In the latter situation, the feedback notably extends the time to extinction (see Figure  
297 4B), which may permit the time to find a rescuing mutation. On average, feedback increases the  
298 number of generations until extinction by 51%, but a broad distribution underlies this number. So,  
299 while this situation is rare, feedback is important for these cases.

300 For the last role, mitigation of fitness losses by feedback, we turn to the vast majority of viable non-  
301 neutral point mutations. In Figure 5, heat maps are shown with the magnitude of the fitness penalty  
302 that a population suffers when the modelled protein has noise (only instant variation) compared to no  
303 noise (vertical axis). As the feedback is never deleterious (see Strict non-negativity of transgenerational  
304 feedback effect on fitness), we can plot this against the percentage mitigated when allowing feedback  
305 (horizontal axis). Every viable non-neutral point mutation of Figure 4A (red and purple pie) is then  
306 placed in a bin along these two axes, with the frequency color-coded (dark blue meaning most  
307 abundant).

308 In Figure 5A, we typically see a 8.7% fitness penalty (dotted line) due to instant variation. Importantly,  
309 68% of this penalty is mitigated by the presence of dosage feedback (a similar conclusion holds for  
310 duplications, see Figure 5-figure supplement 1). There seems to be a trend towards a higher  
311 percentage of mitigation when the fitness penalty is larger, as can be seen by the locations in the plot  
312 of the blue areas from bottom left to top right. This trend is more pronounced for genes for which the  
313 highest fitness losses are possible, namely essential genes (Figure 5B). For these genes, the typical  
314 fitness penalty is 17%, but the average mitigation level increases to about 87%. This illustrates the  
315 contribution of feedback to evolvability; for essential genes in particular, the feedback renders  
316 mutations less deleterious than expected, possibly allowing these mutations to become evolutionary  
317 accessible.

318

## 319 Discussion

320 Epistasis and expression noise are complicating factors for predicting phenotypes and consequentially,  
321 the potential course of evolution. To increase the understanding of the mechanical basis of how these  
322 factors interact, we have applied a minimal model for epistasis including protein expression noise  
323 (MEN-model). Despite the crude approximations of reality, such as binary protein number states, our

324 model accommodated empirical fitness landscapes from (Keren et al., 2016) well, improving on  
325 previous fits in 84% of the cases.

326 Theoretically, several possible roles of noise and the underlying mechanistic basis emerged. Instant  
327 variation, the dosage diversity generated intra-generationally, has the potential to smooth the fitness  
328 landscape. This landscape smoothing provides for short timescales a causal alternative to the  
329 correlation between landscape sharpness and low noise, which has previously been associated to  
330 selection for low noise (Keren et al., 2016). The smoothing comes at the cost of a fitness penalty. This  
331 penalty is strongly mitigated by epigenetic dosage feedback, a mechanism which acts  
332 transgenerationally akin to (Xue & Leibler, 2016) yet adapts to the fitness landscapes as opposed to a  
333 fluctuating environment as Xue and Leibler introduced.

334 To put the feedback in perspective, transgenerational inheritance has been observed at the mRNA  
335 level (Hour-Zeevi, Korem Kohanim, Antonova, & Rechavi, 2020), and epigenetic inheritance of  
336 doubling times has been linked mechanistically to gene expression noise for the palatinose pathway  
337 (Cerulus, New, Pougach, & Verstrepen, 2016). The feedback forms part of a larger panorama of  
338 epigenetic inheritance systems (Jablonka & Szathmáry, 1995), but differs in its relative independence  
339 of biological requirements. Here, the noise-based transgenerational feedback on protein dosage has  
340 an exclusively non-negative effect, also increasing the number of generations until extinction for ill-  
341 adapted mean expression levels.

342 More conceptually, instant variation and feedback combined cause noise to oscillate between the  
343 diversity generating role, which has previously been related to bet-hedging (Philippi & Seger, 1989),  
344 and another role, partial buffering of deleterious expression levels until a genetic improvement is  
345 found. These oscillations resemble an evolutionary LRC-circuit rather than a capacitor as exhibited by  
346 other epigenetic mechanisms (Rutherford & Lindquist, 1998). In this LRC-circuit, 'evolutionary  
347 potential energy' is stored by noise as a capacitor. Upon discharge due to e.g. environmental shock,  
348 much of the potential energy is absorbed by transgenerational feedback into the inductor representing

349 noise as a buffer, though at a loss which the feedback cannot fully compensate (the resistance R). After  
350 a rescuing mutation, energy returns to the capacitor. It must be noted that in this analogy, the  
351 resonance frequency of oscillations is not set by the components but by external, environmental time  
352 scales, unlike in electronics.

353 To determine whether the theoretical expectations hold in realistic circumstances, we constructed  
354 distributions of fitness effects (DFE) for non-neutral point mutations, indels and duplications. This was  
355 done by simulating a representative pool of synthetic fitness landscapes based on our fits of  
356 experimentally determined landscapes in (Keren et al., 2016), and combining these with experimental  
357 distributions of mutational effects (DME) on mean protein expression (e.g. (Hodgins-Davis et al.,  
358 2019b)). In particular, the rare (~0.5%) non-neutral point mutations best revealed the possible roles of  
359 noise.

360 Firstly, the feedback turns out to play only a small role for smoothing the portion of the fitness  
361 landscape that is accessible on the short-term and thus for shaping the target size of non-neutral  
362 mutations. Secondly, the feedback has a notable influence on mitigating the deleterious effect of noise,  
363 namely reduction of fitness. The feedback recovers most of the reduction the instant variation of  
364 protein dosage generates, and is even more important (~87% mitigation) for essential genes. The  
365 feedback is therefore realistically pivotal for surviving fitness valleys, particularly for essential genes.

366

367 Finally, its diverse roles position noise in important historical evolutionary contexts, see Figure 6. By  
368 neutral theory (Kimura, 1983), certain genetic diversity can already be expected by random drift  
369 without a significant phenotype penalty, such that there are multiple dark blue dominant genotypes.  
370 Moreover, because of bet hedging (Philippi & Seger, 1989), suboptimal genotypes are maintained for  
371 more diversity that may become relevant further along adaptation. In addition, feedback mitigates  
372 fitness penalties, which allows more genotypes to be maintained than expected. Complementary to  
373 this genotypic diversity is the phenotypic diversity generated by instant variation, as light through a



374 divergent lens, which reflects back to the optimal phenotype by the feedback as through a parabolic  
375 mirror. The phenotypic variation upon environmental perturbation (Figure 6B) allows time for more  
376 permanent, genetic changes to set in (the Baldwin effect (Simpson, 1953)) that mimic the temporarily  
377 generated phenotype.

378 In this view, the continuous reinforcement of the best phenotype through inheritance of acquired copy  
379 numbers by transgenerational feedback provides a mechanism for Waddington's canalization  
380 (Waddington, 1942), the driver for genetic assimilation (Loison, 2019; Waddington, 1953). Before the  
381 perturbation, the canalization allows for cryptic genotypical diversity and/or lowers the cost of bet-  
382 hedging. After the perturbation, the feedback recanalizes the system to the optimum phenotype as  
383 the feedback continuously acts on the population. In this way, noise is key in various, complementary  
384 evolutionary frameworks.

### 385 [Ideas and speculation](#)

386 Our observations from the simulated DFEs can provide an alternative view on how hub genes emerge.  
387 Hubs have many interactors, and often correlate with essentiality (H. Yu et al., 2004), suggesting that  
388 strongly connected components become difficult to displace. However, it is possible to invert this  
389 causal relation. Due to fitness landscape smoothing by noise, which is theoretically maximal when the  
390 fitness drop as function of expression is highest as in essential genes, noise automatically generates  
391 many non-neutral expression mutations in essential genes (also in our simulations, see Figure 3-figure  
392 supplement 2). It is known that many mutations that affect expression in one gene can actually have  
393 their origin in mutations of other genes (Duveau et al., 2021). Therefore, a relatively large non-neutral  
394 mutation pool is indicative of a large number of proteins that affect expression of our essential genes,  
395 i.e. a large non-neutral pool may involve many interactors. Therefore, essential genes may naturally  
396 become hubs by their predisposition for numerous genetic interactions. This provides an unexpected  
397 alternative view on how essentiality and connectivity are thought to relate to the evolutionary rate  
398 (Fraser, Hirsh, Steinmetz, Scharfe, & Feldman, 2002). In the aforementioned paper the authors

399 propose that connectivity and evolutionary rate correlate by coevolution, and this correlation is not  
400 mediated by mutant fitness effects. However, the fitness effect can set the interactivity rather than  
401 being the intermediate.

402 Moreover, if we combine this alternative essentiality-hub causality with the long-term selection for  
403 lower noise in these sharp landscapes (Keren et al., 2016), this would translate to a push towards less  
404 interactions for essential genes with sharp landscapes. This leads to a reduction of complexity and  
405 concordantly, an increase in modularity. The latter is commonplace in nature with multiple theorized  
406 origins (Wagner, Pavlicev, & Cheverud, 2007), and selection on noise can be one more source.  
407 Therefore, another role for noise may surface through the linkage of noise and genetic architecture.

408

## 409 [Materials and methods](#)

### 410 [MEN-model fits on fitness landscapes from literature](#)

411 We considered the fluorescence values for different promoters and original fits from (Keren et al.,  
412 2016) in glucose conditions. We related observed fluorescence to known WT dosage by dividing all  
413 fluorescence data from the synthetic promoters by the median ratio of fluorescence under  
414 endogenous expression and copy numbers from (Kulak et al., 2014). This was only possible for 73 of  
415 the 81 landscapes. Data at zero expression was supplemented by an essential gene data set, consisting  
416 of the null mutants in yeast strain background S288c from SGD (Cherry et al., 2012) (date of access 01-  
417 08-2019).

418 Fitting model values of  $\lambda_{max}/2$  (with  $\lambda_{max}$  being our population growth factor per generation in Equation  
419 3) to the observed landscapes was performed in Matlab R2016a (as are all calculations throughout this  
420 paper) using the native *fminsearch* to minimize the sum of squared residuals. For essential genes, the  
421 fitness according to the definition of (Keren et al., 2016) at zero expression was set at 0, although any  
422 value below 1 would represent an essential gene here. However, setting the fitness at 0 works well to

423 correctly match modelled (non-)essentiality and actual (non-)essentiality 92% of the time. For the  
424 calculation of the adjusted R-squared of the fits of (Keren et al., 2016), essentiality data is excluded, as  
425 it was not considered in that paper.

426 Fitting parameters  $c$ ,  $k$  and  $d$  and  $V$  were restricted to 0 to  $\infty$ , -10 to 10, 0 to 2 and 0.1 to 1 (the latter  
427 as feasible range in (Chong et al., 2015)) respectively. We note that this  $V$  only has relevance in the  
428 context of these fits, as it represents an effective noise originating from the various synthetic  
429 promoters combined. Fits are then further fine-tuned with the Matlab's R2016a *fit* function, where the  
430 restrictions on  $k$  are fully relaxed to also provide  $k$  with a (67%) confidence interval.

431

#### 432 [Simulation of representative DFEs](#)

433 To generate the DFE as a function of background fitness, we first create a representative gene pool  
434 based on the model fits from the 61 fitness landscapes of (Keren et al., 2016) whose fits quality  
435 improved the original fits from that paper. Within the class of essential and non-essential genes  
436 separately, we resample new progeny shapes from random combinations of fitted model parameters  
437  $c$ ,  $k$  and  $d$ . As can be inferred from Appendix 1-figure 1C, essential genes (with large effect of deletions)  
438 constitute a relatively large part of the data set and we correct for this bias. This yields a balance  
439 between various fitness landscapes at shown in Figure 3-figure supplement 1B such that approximately  
440 19% (Giaever et al., 2002) of all combinations corresponds to essential gene profiles (5000 simulated  
441 genes in total except for Appendix 1-figure 3). We also assume fitness at WT expression is at >95% of  
442 the maximal value, such that WT is relatively optimized, and then normalize all fitness values for that  
443 gene to the value at WT expression. By setting different values for cycle time  $T$  (between -50% and  
444  $\sim$ +5% relative to WT) and randomly assigning a noise level drawn from (Chong et al., 2015), we  
445 generate simulated fitness landscapes as function of expression, where background fitness is then  
446 defined as the fitness at WT expression at the various cycle times. For Figure 3, Figure 3-figure  
447 supplement 2 and Figure 5-figure supplement 1B, the absolute mutational fitness effects considered

448 are compared to the background fitness of each respective scenario (instant variation + feedback, only  
449 feedback or no noise), otherwise background fitness with instant variation and feedback is assumed.

450 To convert these landscapes to DFEs, we transform for point mutations the expression axis to mutation  
451 frequency using the DME data from (Hodgins-Davis et al., 2019a, 2019b). After converting the observed  
452 counts to a density by normal kernel density smoothing, we interpret the control distributions as point-  
453 spread functions blurring the real mutation distributions. We then retrieve the latter by Lucy-  
454 Richardson deconvolution (Fish, Brinicombe, Pike, & Walker, 1995), as applied in Matlab's *deconvlucy*  
455 of the observed mutation distributions. Using 201 uniform samples of the average DME, we obtain the  
456 DFE by expression mutants, as a function of background fitness. DMEs of the indels and duplications  
457 are trivially only non-zero at zero and twice the WT expression.

458 We then consider the DFEs for the three scenario's: with/without noise (instant variation + feedback)  
459 where fitness follows from equations 3 and SI.8, and with feedback suppressed (SI.12). To avoid  
460 singularities in the calculation of the cumulative distribution function, we set zero and infinite noise  
461 values to  $10^{-20}$  and  $10^{20}$  respectively instead.

462

### 463 [Essentiality and interactions](#)

464 Essential gene data is from the SGD Project (Cherry et al., 2012), date of access 1 August 2019,  
465 interactions data from BioGRID (Stark et al., 2006), date of access 3 February 2022. As our interactions  
466 of interest are genetic, we consider the number of interacting proteins per protein of interest for which  
467 a genetic but not a physical interaction exists. The essential genes are those genes that yield inviability  
468 with a null mutations in a S288C background.

469

470

## 471 Acknowledgements

472 We thank Marieke Glazenburg and Djordje Bajić for careful reading of the manuscript. LL gratefully  
473 acknowledges funding from the European Research Council (ERC) under the European Union’s Horizon  
474 2020 research and innovation programme (Grant agreement No. [758132]).

475

## 476 Conflicts of interest

477 Authors declare no competing interests.

## 478 Bibliography

479 Akaike, H. (1974). A new look at the statistical model identification. *IEEE Transactions on Automatic*  
480 *Control*, 19(6), 716–723.

481 Bank, C., Matuszewski, S., Hietpas, R. T., & Jensen, J. D. (2016). On the (un) predictability of a large  
482 intragenic fitness landscape. *Proceedings of the National Academy of Sciences*, 113(49),  
483 14085–14090.

484 Bar-Even, A., Paulsson, J., Maheshri, N., Carmi, M., O’Shea, E., Pilpel, Y., & Barkai, N. (2006). Noise in  
485 protein expression scales with natural protein abundance. *Nature Genetics*, 38(6), 636–643.

486 Brauns, F., de la Cruz, L. M. I., Daalman, W. K.-G., de Bruin, I., Halatek, J., Laan, L., & Frey, E. (2020).  
487 Adaptability and evolution of the cell polarization machinery in budding yeast. *bioRxiv*.  
488 <https://doi.org/https://doi.org/10.1101/2020.09.09.290510>

489 Burnham, K. P., & Anderson, D. R. (2004). Multimodel inference: understanding AIC and BIC in model  
490 selection. *Sociological Methods & Research*, 33(2), 261–304.

491 Cai, L., Friedman, N., & Xie, X. S. (2006). Stochastic protein expression in individual cells at the single  
492 molecule level. *Nature*, 440(7082), 358–362. <https://doi.org/10.1038/nature04599>

- 493 Cerulus, B., New, A. M., Pougach, K., & Verstrepen, K. J. (2016). Noise and Epigenetic Inheritance of  
494 Single-Cell Division Times Influence Population Fitness. *Current Biology*, 26(9), 1138–1147.  
495 <https://doi.org/10.1016/j.cub.2016.03.010>
- 496 Chechik, G., Oh, E., Rando, O., Weissman, J., Regev, A., & Koller, D. (2008). Activity motifs reveal  
497 principles of timing in transcriptional control of the yeast metabolic network. *Nature*  
498 *Biotechnology*, 26(11), 1251–1259.
- 499 Cherry, J. M., Hong, E. L., Amundsen, C., Balakrishnan, R., Binkley, G., Chan, E. T., ... Wong, E. D. (2012).  
500 Saccharomyces Genome Database: the genomics resource of budding yeast. *Nucleic Acids*  
501 *Research*, 40(D1), D700–D705. <https://doi.org/10.1093/nar/gkr1029>
- 502 Chong, Y. T., Koh, J. L. Y., Friesen, H., Kaluarachchi Duffy, S., Cox, M. J., Moses, A., ... Andrews, B. J.  
503 (2015). Yeast Proteome Dynamics from Single Cell Imaging and Automated Analysis. *Cell*,  
504 161(6), 1413–1424. <https://doi.org/10.1016/j.cell.2015.04.051>
- 505 Chou, H.-H., Chiu, H.-C., Delaney, N. F., Segrè, D., & Marx, C. J. (2011). Diminishing returns epistasis  
506 among beneficial mutations decelerates adaptation. *Science*, 332(6034), 1190–1192.
- 507 Christiano, R., Nagaraj, N., Fröhlich, F., & Walther, T. C. (2014). Global Proteome Turnover Analyses of  
508 the Yeasts *S. cerevisiae* and *S. pombe*. *Cell Reports*, 9(5), 1959–1965.  
509 <https://doi.org/10.1016/j.celrep.2014.10.065>
- 510 Coomer, M. A., Ham, L., & Stumpf, M. P. H. (2022). Noise distorts the epigenetic landscape and shapes  
511 cell-fate decisions. *Cell Systems*, 13(1), 83–102.e6. <https://doi.org/10.1016/j.cels.2021.09.002>
- 512 Curk, T. (2016). *Modelling multivalent interactions* (PhD Thesis). University of Cambridge.
- 513 Daalman, W. K.-G., Sweep, E., & Laan, L. (2021). A tractable bottom-up model of the yeast polarity  
514 genotype-phenotype map for evolutionary relevant predictions. *bioRxiv*, 2020.11.09.374363.  
515 <https://doi.org/10.1101/2020.11.09.374363>
- 516 Dhondt, I., Petyuk, V. A., Bauer, S., Brewer, H. M., Smith, R. D., Depuydt, G., & Braeckman, B. P. (2017).  
517 Changes of Protein Turnover in Aging *Caenorhabditis elegans*. *Molecular & Cellular Proteomics*,  
518 16(9), 1621–1633. <https://doi.org/10.1074/mcp.RA117.000049>

- 519 Diaz-Uriarte, R., & Vasallo, C. (2019). Every which way? On predicting tumor evolution using cancer  
520 progression models. *PLoS Computational Biology*, *15*(8), e1007246.
- 521 Du, X., King, A. A., Woods, R. J., & Pascual, M. (2017). Evolution-informed forecasting of seasonal  
522 influenza A (H3N2). *Science Translational Medicine*, *9*(413).
- 523 Duveau, F., Vande Zande, P., Metzger, B. P., Diaz, C. J., Walker, E. A., Tryban, S., ... Wittkopp, P. J. (2021).  
524 Mutational sources of trans-regulatory variation affecting gene expression in *Saccharomyces*  
525 *cerevisiae*. *eLife*, *10*. <https://doi.org/10.7554/eLife.67806>
- 526 Farslow, J. C., Lipinski, K. J., Packard, L. B., Edgley, M. L., Taylor, J., Flibotte, S., ... Bergthorsson, U.  
527 (2015). Rapid Increase in frequency of gene copy-number variants during experimental  
528 evolution in *Caenorhabditis elegans*. *BMC Genomics*, *16*(1). [https://doi.org/10.1186/s12864-](https://doi.org/10.1186/s12864-015-2253-2)  
529 [015-2253-2](https://doi.org/10.1186/s12864-015-2253-2)
- 530 Ferrell, J. E., & Ha, S. H. (2014a). Ultrasensitivity part I: Michaelian responses and zero-order  
531 ultrasensitivity. *Trends in Biochemical Sciences*, *39*(10), 496–503.  
532 <https://doi.org/10.1016/j.tibs.2014.08.003>
- 533 Ferrell, J. E., & Ha, S. H. (2014b). Ultrasensitivity part III: cascades, bistable switches, and oscillators.  
534 *Trends in Biochemical Sciences*, *39*(12), 612–618. <https://doi.org/10.1016/j.tibs.2014.10.002>
- 535 Ferrell, J. E., Jr, & Ha, S. H. (2014). Ultrasensitivity part II: multisite phosphorylation, stoichiometric  
536 inhibitors, and positive feedback. *Trends in Biochemical Sciences*, *39*(11), 556–569.  
537 <https://doi.org/10.1016/j.tibs.2014.09.003>
- 538 Fish, D. A., Brinicombe, A. M., Pike, E. R., & Walker, J. G. (1995). Blind deconvolution by means of the  
539 Richardson–Lucy algorithm. *JOSA A*, *12*(1), 58–65.
- 540 Fraser, H. B., Hirsh, A. E., Giaever, G., Kumm, J., & Eisen, M. B. (2004). Noise Minimization in Eukaryotic  
541 Gene Expression. *PLoS Biology*, *2*(6), e137. <https://doi.org/10.1371/journal.pbio.0020137>
- 542 Fraser, H. B., Hirsh, A. E., Steinmetz, L. M., Scharfe, C., & Feldman, M. W. (2002). Evolutionary rate in  
543 the protein interaction network. *Science*, *296*(5568), 750–752.

- 544 Friedman, N., Cai, L., & Xie, X. S. (2006). Linking stochastic dynamics to population distribution: an  
545 analytical framework of gene expression. *Physical Review Letters*, *97*(16), 168302.
- 546 Giaever, G., Chu, A. M., Ni, L., Connelly, C., Riles, L., Véronneau, S., ... Andre, B. (2002). Functional  
547 profiling of the *Saccharomyces cerevisiae* genome. *Nature*, *418*(6896), 387–391.
- 548 Hodgins-Davis, A., Duveau, F., Walker, E. A., & Wittkopp, P. J. (2019a). Dataset for ‘Empirical measures  
549 of mutational effects define neutral models of regulatory evolution in *Saccharomyces*  
550 *cerevisiae*’. University of Michigan - Deep Blue. Retrieved from [https://doi.org/10.7302/0dvr-](https://doi.org/10.7302/0dvr-k169)  
551 [k169](https://doi.org/10.7302/0dvr-k169)
- 552 Hodgins-Davis, A., Duveau, F., Walker, E. A., & Wittkopp, P. J. (2019b). Empirical measures of  
553 mutational effects define neutral models of regulatory evolution in *Saccharomyces cerevisiae*.  
554 *Proceedings of the National Academy of Sciences*, *116*(42), 21085–21093.
- 555 Houriz-Zeevi, L., Korem Kohanim, Y., Antonova, O., & Rechavi, O. (2020). Three Rules Explain  
556 Transgenerational Small RNA Inheritance in *C. elegans*. *Cell*, *182*(5), 1186–1197.e12.  
557 <https://doi.org/10.1016/j.cell.2020.07.022>
- 558 Jablonka, E., & Szathmáry, E. (1995). The evolution of information storage and heredity. *Trends in*  
559 *Ecology & Evolution*, *10*(5), 206–211.
- 560 Johnson, M. S., Martsul, A., Kryazhimskiy, S., & Desai, M. M. (2019). Higher-fitness yeast genotypes are  
561 less robust to deleterious mutations. *Science*, *366*(6464), 490–493.
- 562 Keren, L., Hausser, J., Lotan-Pompan, M., Vainberg Slutskin, I., Alisar, H., Kaminski, S., ... Segal, E. (2016).  
563 Massively Parallel Interrogation of the Effects of Gene Expression Levels on Fitness. *Cell*,  
564 *166*(5), 1282–1294.e18. <https://doi.org/10.1016/j.cell.2016.07.024>
- 565 Keren, L., van Dijk, D., Weingarten-Gabbay, S., Davidi, D., Jona, G., Weinberger, A., ... Segal, E. (2015).  
566 Noise in gene expression is coupled to growth rate. *Genome Research*, *25*(12), 1893–1902.  
567 <https://doi.org/10.1101/gr.191635.115>
- 568 Khan, A. I., Dinh, D. M., Schneider, D., Lenski, R. E., & Cooper, T. F. (2011). Negative epistasis between  
569 beneficial mutations in an evolving bacterial population. *Science*, *332*(6034), 1193–1196.



- 570 Kimura, M. (1983). *The neutral theory of molecular evolution*. Cambridge University Press.
- 571 Kleijn, I. T., Krahl, L. H. J., & Hermesen, R. (2018). Noise propagation in an integrated model of bacterial  
572 gene expression and growth. *PLOS Computational Biology*, *14*(10), e1006386.  
573 <https://doi.org/10.1371/journal.pcbi.1006386>
- 574 Kosuri, S., Goodman, D. B., Cambrey, G., Mutalik, V. K., Gao, Y., Arkin, A. P., ... Church, G. M. (2013).  
575 Composability of regulatory sequences controlling transcription and translation in *Escherichia*  
576 *coli*. *Proceedings of the National Academy of Sciences*, *110*(34), 14024–14029.  
577 <https://doi.org/10.1073/pnas.1301301110>
- 578 Kryazhimskiy, S., Rice, D. P., Jerison, E. R., & Desai, M. M. (2014). Global epistasis makes adaptation  
579 predictable despite sequence-level stochasticity. *Science*, *344*(6191), 1519–1522.
- 580 Kulak, N. A., Pichler, G., Paron, I., Nagaraj, N., & Mann, M. (2014). Minimal, encapsulated proteomic-  
581 sample processing applied to copy-number estimation in eukaryotic cells. *Nature Methods*,  
582 *11*(3), 319–324. <https://doi.org/10.1038/nmeth.2834>
- 583 Kvitek, D. J., & Sherlock, G. (2011). Reciprocal Sign Epistasis between Frequently Experimentally  
584 Evolved Adaptive Mutations Causes a Rugged Fitness Landscape. *PLoS Genetics*, *7*(4),  
585 e1002056. <https://doi.org/10.1371/journal.pgen.1002056>
- 586 Larrimore, K. E., & Rancati, G. (2019). The conditional nature of gene essentiality. *Current Opinion in*  
587 *Genetics & Development*, *58*, 55–61.
- 588 Li, X., Lalić, J., Baeza-Centurion, P., Dhar, R., & Lehner, B. (2019). Changes in gene expression  
589 predictably shift and switch genetic interactions. *Nature Communications*, *10*(1).  
590 <https://doi.org/10.1038/s41467-019-11735-3>
- 591 Loison, L. (2019). Canalization and genetic assimilation: Reassessing the radicality of the  
592 Waddingtonian concept of inheritance of acquired characters. *Seminars in Cell &*  
593 *Developmental Biology*, *88*, 4–13. <https://doi.org/10.1016/j.semcdb.2018.05.009>

- 594 Mineta, K., Matsumoto, T., Osada, N., & Araki, H. (2015). Population genetics of non-genetic traits:  
595 Evolutionary roles of stochasticity in gene expression. *Gene*, *562*(1), 16–21.  
596 <https://doi.org/10.1016/j.gene.2015.03.011>
- 597 Miton, C. M., & Tokuriki, N. (2016). How mutational epistasis impairs predictability in protein evolution  
598 and design. *Protein Science*, *25*(7), 1260–1272.
- 599 Murray, A. W. (2020). Can gene-inactivating mutations lead to evolutionary novelty? *Current Biology*,  
600 *30*(10), R465–R471.
- 601 Muschiol, D., Schroeder, F., & Traunspurger, W. (2009). Life cycle and population growth rate of  
602 *Caenorhabditis elegans* studied by a new method. *BMC Ecology*, *9*(1), 14.  
603 <https://doi.org/10.1186/1472-6785-9-14>
- 604 Mutalik, V. K., Guimaraes, J. C., Cambray, G., Lam, C., Christoffersen, M. J., Mai, Q.-A., ... Endy, D. (2013).  
605 Precise and reliable gene expression via standard transcription and translation initiation  
606 elements. *Nature Methods*, *10*(4), 354–360. <https://doi.org/10.1038/nmeth.2404>
- 607 Nagar, N., Ecker, N., Loewenthal, G., Avram, O., Ben-Meir, D., Biran, D., ... Pupko, T. (2021). Harnessing  
608 machine learning to unravel protein degradation in *Escherichia coli*. *Msystems*, *6*(1), e01296-  
609 20.
- 610 Neher, R. A., & Bedford, T. (2015). nextflu: real-time tracking of seasonal influenza virus evolution in  
611 humans. *Bioinformatics*, *31*(21), 3546–3548. <https://doi.org/10.1093/bioinformatics/btv381>
- 612 Panchy, N., Lehti-Shiu, M., & Shiu, S.-H. (2016). Evolution of Gene Duplication in Plants. *Plant*  
613 *Physiology*, *171*(4), 2294–2316. <https://doi.org/10.1104/pp.16.00523>
- 614 Philippi, T., & Seger, J. (1989). Hedging one's evolutionary bets, revisited. *Trends in Ecology & Evolution*,  
615 *4*(2), 41–44.
- 616 Prinz, H. (2010). Hill coefficients, dose–response curves and allosteric mechanisms. *Journal of Chemical*  
617 *Biology*, *3*(1), 37–44. <https://doi.org/10.1007/s12154-009-0029-3>
- 618 Rutherford, S. L., & Lindquist, S. (1998). Hsp90 as a capacitor for morphological evolution. *Nature*,  
619 *396*(6709), 336–342.

- 620 Sailer, Z. R., & Harms, M. J. (2017). High-order epistasis shapes evolutionary trajectories. *PLOS*  
621 *Computational Biology*, 13(5), e1005541. <https://doi.org/10.1371/journal.pcbi.1005541>
- 622 Sánchez, Á., Vila, J. C., Chang, C.-Y., Diaz-Colunga, J., Estrela, S., & Rebolleda-Gomez, M. (2021).  
623 Directed evolution of microbial communities. *Annual Review of Biophysics*, 50, 323.
- 624 Sanjuán, R., & Elena, S. F. (2006). Epistasis correlates to genomic complexity. *Proceedings of the*  
625 *National Academy of Sciences*, 103(39), 14402–14405.
- 626 Schmiedel, J. M., Carey, L. B., & Lehner, B. (2019). Empirical mean-noise fitness landscapes reveal the  
627 fitness impact of gene expression noise. *Nature Communications*, 10(1).  
628 <https://doi.org/10.1038/s41467-019-11116-w>
- 629 Schoustra, S., Hwang, S., Krug, J., & de Visser, J. A. G. M. (2016). Diminishing-returns epistasis among  
630 random beneficial mutations in a multicellular fungus. *Proceedings of the Royal Society B:*  
631 *Biological Sciences*, 283(1837), 20161376. <https://doi.org/10.1098/rspb.2016.1376>
- 632 Shen, X., Song, S., Li, C., & Zhang, J. (2022). Synonymous mutations in representative yeast genes are  
633 mostly strongly non-neutral. *Nature*. <https://doi.org/10.1038/s41586-022-04823-w>
- 634 Simpson, G. G. (1953). The Baldwin effect. *Evolution*, 7(2), 110–117.
- 635 Smith, N. J., Walt, S. van der, & Firing, E. (2015). *Magma, inferno, plasma and viridis colormaps*.  
636 Retrieved from <https://github.com/BIDS/colormap/blob/master/colormaps.py>
- 637 Stark, C., Breitkreutz, B.-J., Reguly, T., Boucher, L., Breitkreutz, A., & Tyers, M. (2006). BioGRID: a  
638 general repository for interaction datasets. *Nucleic Acids Research*, 34(90001), D535–D539.  
639 <https://doi.org/10.1093/nar/gkj109>
- 640 Waddington, C. H. (1942). Canalization of development and the inheritance of acquired characters.  
641 *Nature*, 150(3811), 563.
- 642 Waddington, C. H. (1953). Genetic assimilation of an acquired character. *Evolution*, 118–126.
- 643 Wagner, G. P., Pavlicev, M., & Cheverud, J. M. (2007). The road to modularity. *Nature Reviews Genetics*,  
644 8(12), 921–931. <https://doi.org/10.1038/nrg2267>

- 645 Wang, Z., & Zhang, J. (2011). Impact of gene expression noise on organismal fitness and the efficacy of  
646 natural selection. *Proceedings of the National Academy of Sciences*, *108*(16), E67–E76.  
647 <https://doi.org/10.1073/pnas.1100059108>
- 648 Wapinski, I., Pfeffer, A., Friedman, N., & Regev, A. (2007). Natural history and evolutionary principles  
649 of gene duplication in fungi. *Nature*, *449*(7158), 54–61. <https://doi.org/10.1038/nature06107>
- 650 Wherry, R. J. (1931). A new formula for predicting the shrinkage of the coefficient of multiple  
651 correlation. *The Annals of Mathematical Statistics*, *2*(4), 440–457.
- 652 Xue, B., & Leibler, S. (2016). Evolutionary learning of adaptation to varying environments through a  
653 transgenerational feedback. *Proceedings of the National Academy of Sciences*, *113*(40),  
654 11266–11271. <https://doi.org/10.1073/pnas.1608756113>
- 655 Yu, H., Greenbaum, D., Lu, H. X., Zhu, X., & Gerstein, M. (2004). Genomic analysis of essentiality within  
656 protein networks. *TRENDS in Genetics*, *20*(6), 227–231.
- 657 Yu, J., Xiao, J., Ren, X., Lao, K., & Xie, X. S. (2006). Probing gene expression in live cells, one protein  
658 molecule at a time. *Science*, *311*(5767), 1600–1603.
- 659 Zhang, J. (2003). Evolution by gene duplication: an update. *Trends in Ecology & Evolution*, *18*(6), 292–  
660 298. [https://doi.org/10.1016/S0169-5347\(03\)00033-8](https://doi.org/10.1016/S0169-5347(03)00033-8)
- 661 Zhang, Z., Qian, W., & Zhang, J. (2009). Positive selection for elevated gene expression noise in yeast.  
662 *Molecular Systems Biology*, *5*(1), 299. <https://doi.org/10.1038/msb.2009.58>
- 663 Zomorodi, A. R., & Segrè, D. (2016). Synthetic Ecology of Microbes: Mathematical Models and  
664 Applications. *Journal of Molecular Biology*, *428*(5), 837–861.  
665 <https://doi.org/10.1016/j.jmb.2015.10.019>

666

667

668 [Figures](#)

669

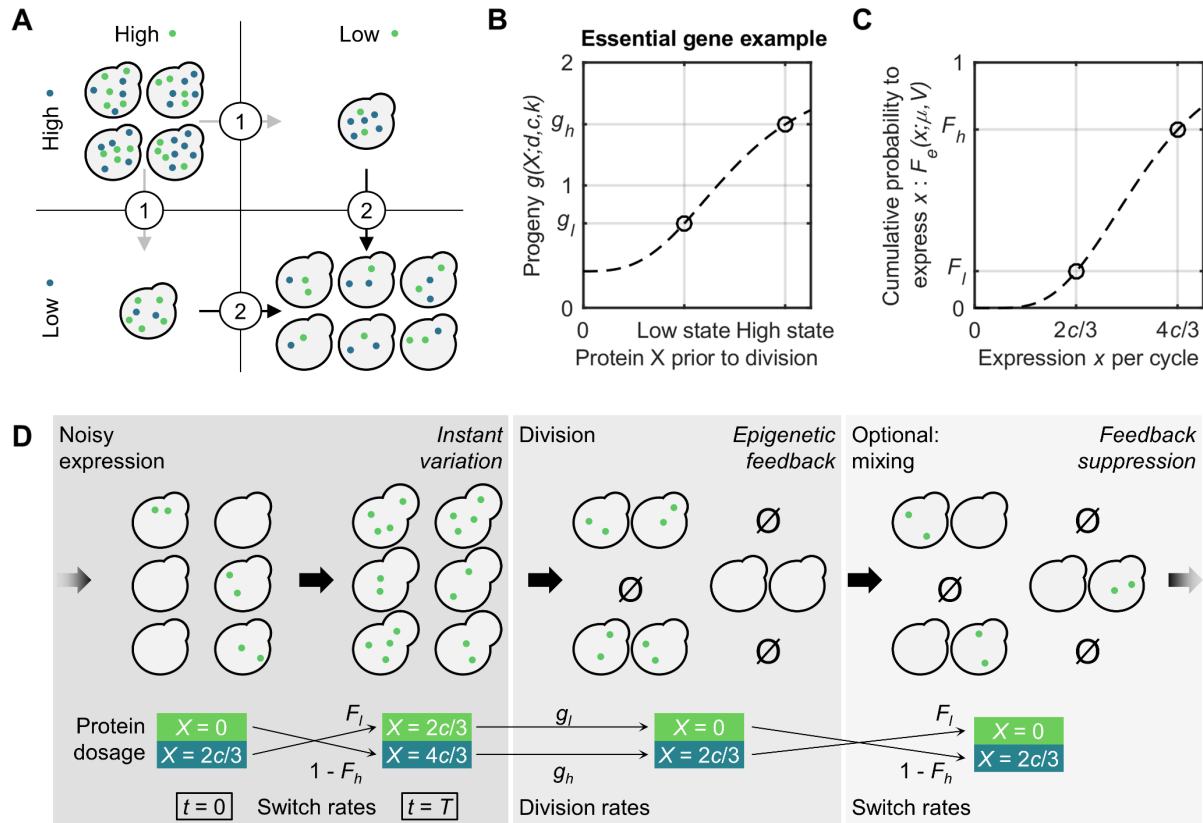

670

671 **Figure 1 Overview of the generation-based MEN-population model for adaptive epistasis under**  
 672 **influence of expression noise. (A) Conceptual view of (sign) epistasis between two genes, whose**  
 673 **gene products can be in a low or high dosage. Starting at high dosages, the first adaptive step always**  
 674 **reduces fitness, but must precede the second step to yield an overall superior fitness. The number**  
 675 **of cells in this cartoon depicts the fitness of that state. (B) Model description of progeny  $g$  from an**  
 676 **individual cell as function of a single protein dosage  $X$  following a Hill curve, in this case illustrated**  
 677 **for an essential gene product. Two states symmetric to the tipping point concentration  $c$  in the curve**  
 678 **can be identified: low or high dosage. The progeny in the worst state is defined as  $g_l$ , in the best state**  
 679 **as  $g_h$ . Parameters  $d$  and  $k$  determine the depth and steepness of the Hill curve. (C) When protein is**  
 680 **expressed in one burst per cell cycle (in amount  $x$ ), cells can switch states stochastically each cycle**  
 681 **with probabilities following the cumulative distribution function  $F_e$  to switch dosage states.  $F_l$  and  $1-$**   
 682  **$F_h$  are the respective chances to switch from the high to low state or vice versa. Probabilities depend**  
 683 **on mean expression level  $\mu$  and expression coefficient of variation (noise level)  $V$ . (D) Graphical**  
 684 **overview of the minimal epistasis-noise (MEN-) model concerning a population of cells that once per**

685 cycle time  $T$  can stochastically switch between two protein dosage states (high/low, represented by  
 686 dots) before division. The right-most patch denotes an optional addition to the MEN-model, where  
 687 inheritance of dosage is suppressed by resetting the population dosage distribution.  
 688

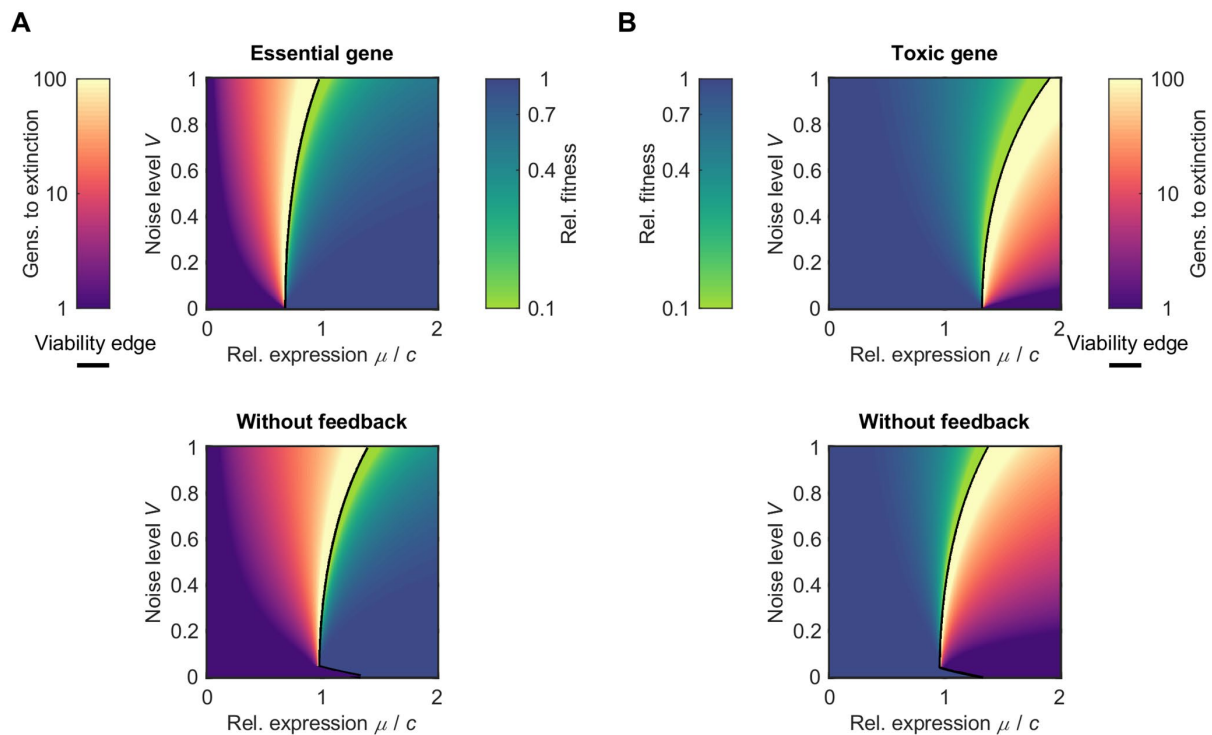

689  
 690 **Figure 2** Two fitness landscape types with structurally and temporarily viable regimes, with and  
 691 without feedback. Landscapes are given as heat maps plots as function of relative expression  $\mu$   
 692 (scaled by tipping point concentration  $c$ ) and noise level  $V$ . Blue to light green colors denote the log  
 693 of relative fitness  $\omega_r$ , whereas the yellow to purple colors denote how many generations a  
 694 population of  $10^6$  cells is expected to survive. The two regimes are separated by a black line. All plots  
 695 assume a gamma cdf  $F_e$ , essential and toxic genes have  $|k|=10^5$  and  $d=0$ . For completeness, noise  
 696 levels below the feasible range in (Chong et al., 2015), where 99.8% of genes falls in  $0.1 < V < 1$ , are  
 697 plotted, with values below the discontinuity in the viability edge approximated. Color maps from  
 698 (Smith, Walt, & Firing, 2015).

699

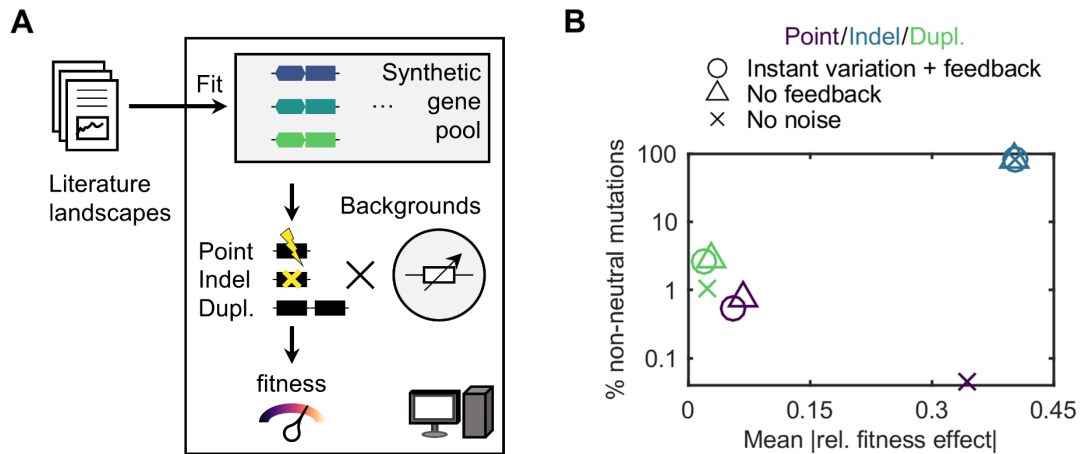

700

701 **Figure 3 Role of noise on fitness effects of point mutations, indels and duplications. (A) Workflow**  
 702 **for generating modelled distribution of fitness effects (DFE) from MEN-model fits of literature fitness**  
 703 **landscapes. The fits on landscapes of (Keren et al., 2016) (with expression scaling from (Kulak et al.,**  
 704 **2014)) and noise levels from (Chong et al., 2015), fuel construction of a representative gene pool.**  
 705 **For one gene at a time, mutations (proxies for point mutations, indels/loss-of-function mutations,**  
 706 **and duplications) are imposed while also varying background fitness to mimic different stages in**  
 707 **adaptation. This yield simulated DFEs as function of background fitness for various mutation types.**  
 708 **(B) Percentage of non-neutral mutations in the DFEs for the aforementioned mutation types. Marker**  
 709 **symbols denote the case with instant variation and feedback, only instant variation and no noise.**

710

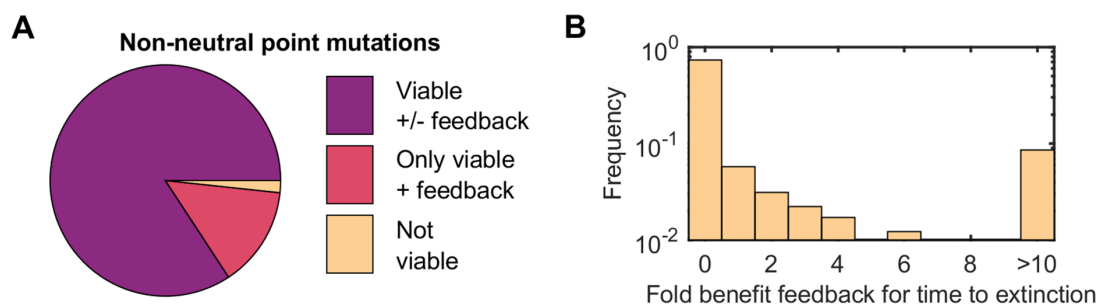

711

712 **Figure 4 Viability effects of transgenerational feedback. (A) Division of effects of feedback on viability**  
 713 **for non-neutral point mutations. (B) Generations to extinction for non-neutral point mutations when**  
 714 **the colony is not structurally viable despite feedback.**

715

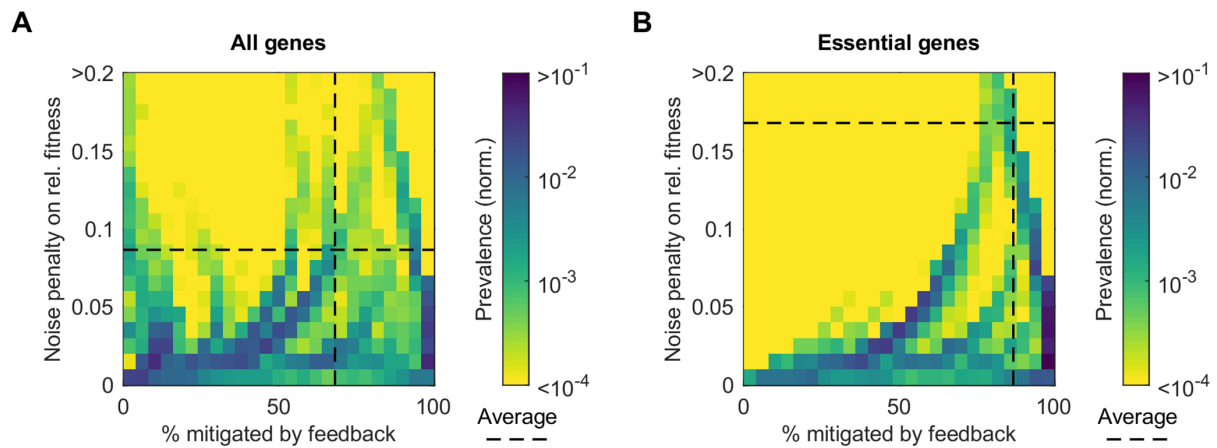

716

717 **Figure 5 Fitness penalty mitigation by transgenerational feedback. (A) Heat map denoting the**  
718 **frequency (color coded) of non-neutral point mutations with a fitness penalty associated to instant**  
719 **variation by expression noise and a certain mitigation level of feedback. Dashed line denotes average**  
720 **values. (B) The same plot as in (A), only for essential genes.**

721



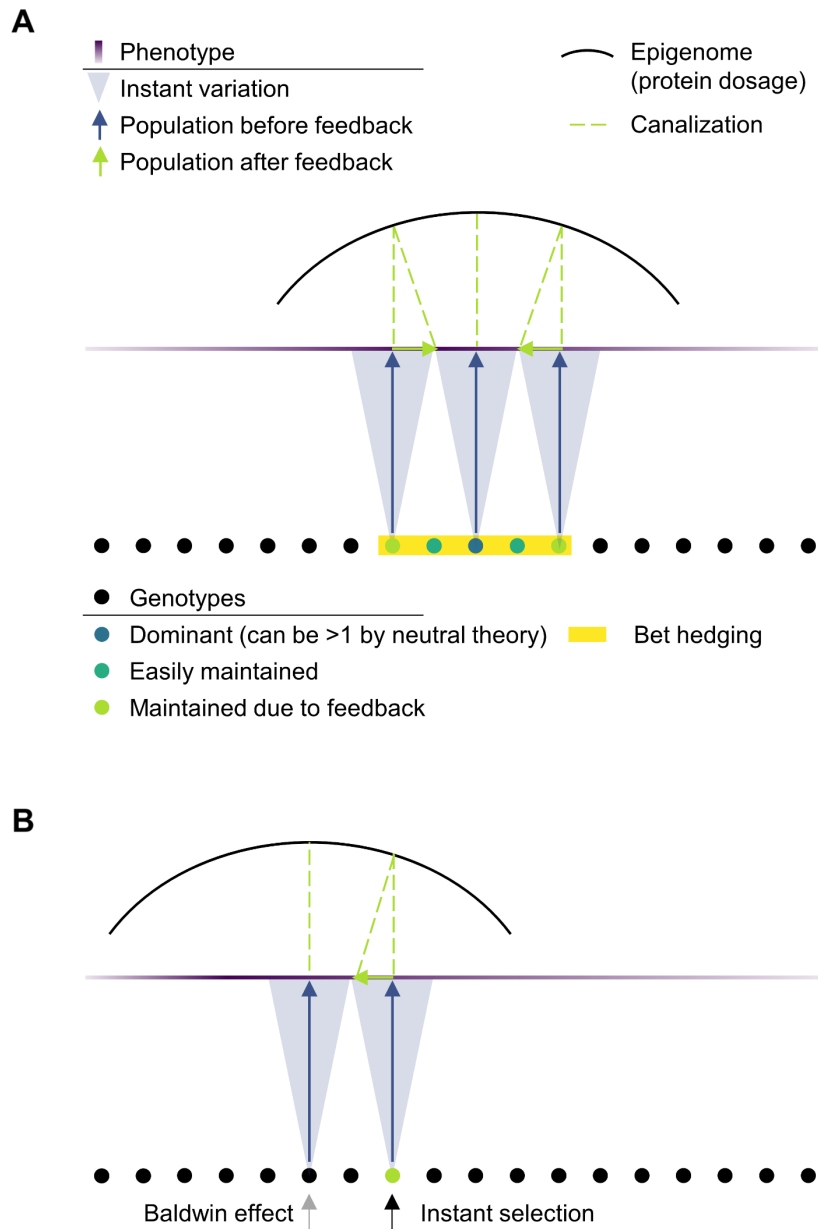

722

723 **Figure 6 Roles of noise, including transgenerational feedback, in adaptive processes. (A) In addition**  
 724 **to the genetic diversity permitted by neutral theory, noise generates phenotypic diversity, for**  
 725 **example to prime bet-hedging, during low selective conditions. The instant variation acts as a**  
 726 **diverging lens from the genotype plane, which is later refocused onto the phenotype plane through**  
 727 **the epigenome acting as a parabolic reflector by making use of transgenerational feedback. This**  
 728 **reflection corresponds to a canalization mechanism. (B) After perturbation, the transgenerational**  
 729 **feedback as a proper canalization mechanism refocuses the GP-path in the direction of the optimal**

730 **phenotype. Further genetic adaptation occurs by making use of the enhanced bet-hedging**  
731 **possibilities from panel (A), and if needed the Baldwin effect to consolidate adaptation.**

732

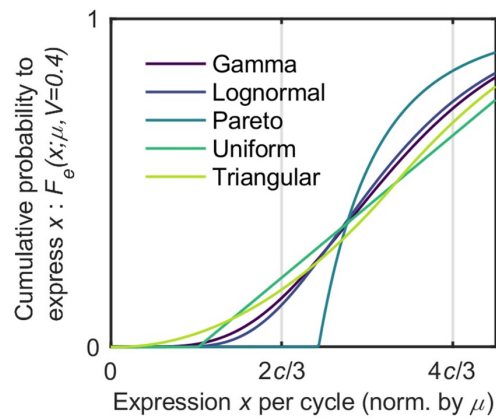

733

734 **Figure 1-figure supplement 1 Five cumulative distribution functions for fixed  $V$  (at 0.4), as function**  
735 **of expression per cycle, rescaled to the mean expression. Horizontal axis ticks indicate the low and**  
736 **high states in the MEN-model.**

737

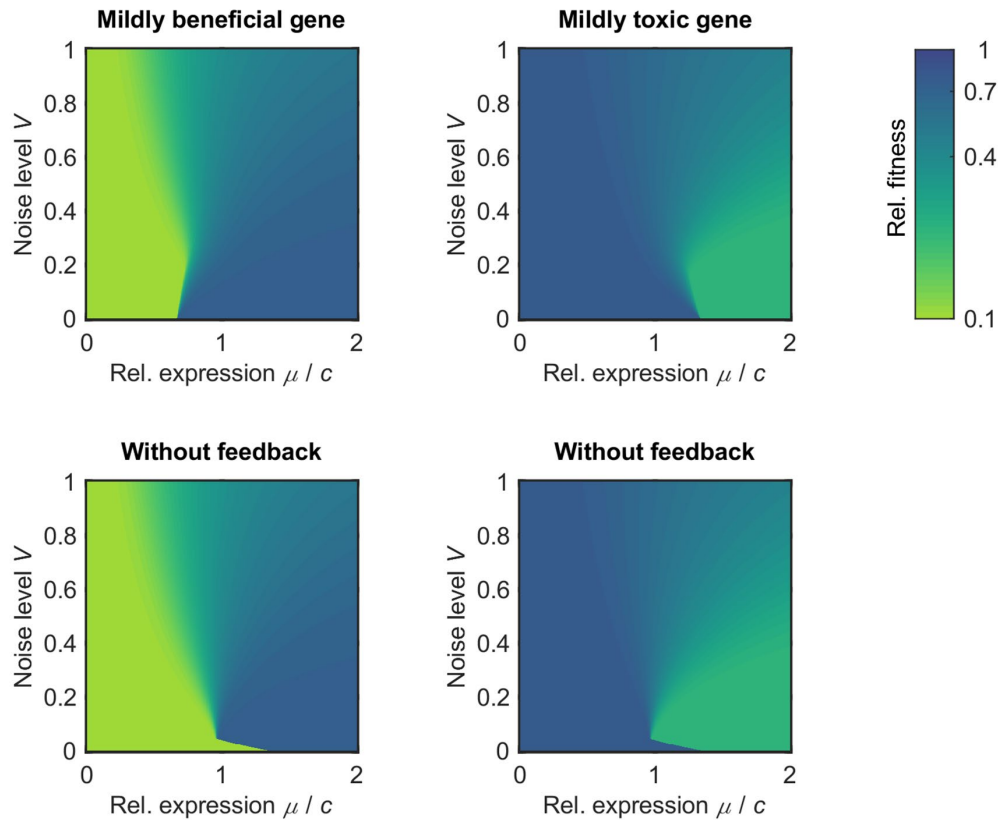

738

739 **Figure 2-figure supplement 1 Two fitness landscape types with structurally viable regimes, with and**  
740 **without feedback. Landscapes are given as heat maps plots as function of relative expression  $\mu$**   
741 **(scaled by tipping point concentration  $c$ ) and noise level  $V$  (from 0 to 1, which covers 99.8% of the**  
742 **genes in (Chong et al., 2015)). Blue to light green colors denote the log of relative fitness  $\omega_r$ . All plots**  
743 **assume a gamma cdf  $F_e$ ,  $|k|=3$  and  $d=0.8$ .**

744

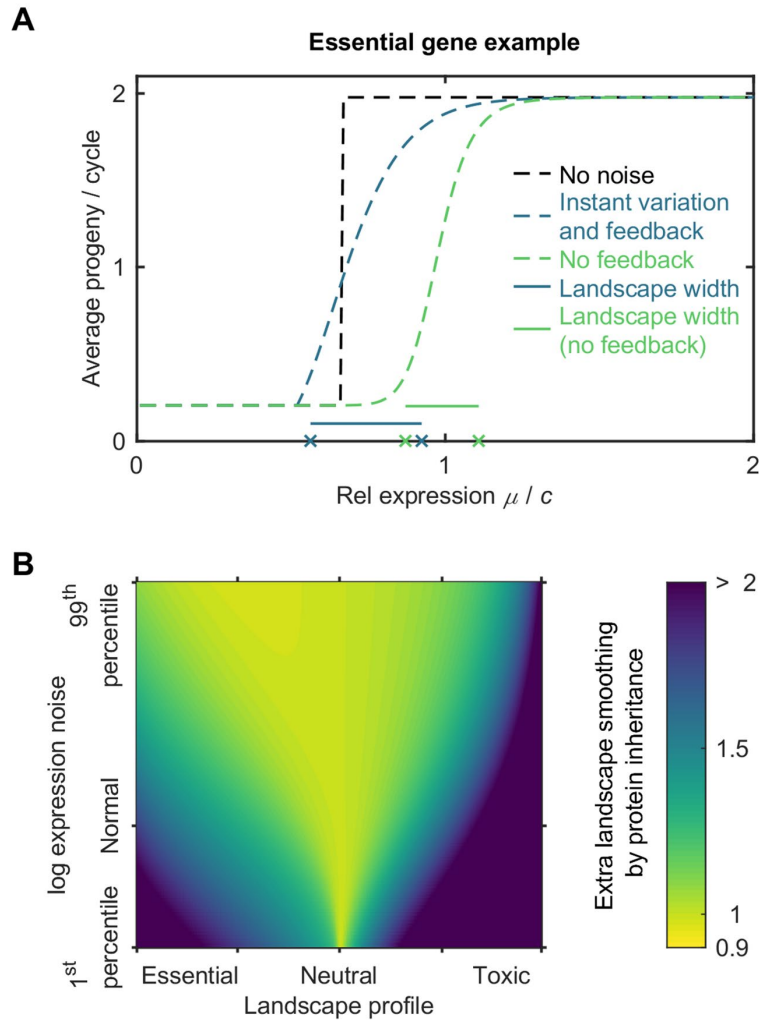

745

746 **Figure 2-figure supplement 2 Theoretical effect of transgenerational feedback on smoothing of**  
 747 **fitness landscapes in the MEN-model. (A) Example fitness landscape to illustrate the definition of**  
 748 **landscape width as expression range for which fitness falls between 10% and 90% of the maximum**  
 749 **for a given noise level  $V$  and progeny difference between the high and low state. (B) Ratio of widths**  
 750 **between the cases with and without feedback. We assume a gamma cdf  $F_{e,1}$  and  $|k|=15$ , a typical**  
 751 **fitted value fitted (see Appendix 1-figure 1C).**

752

753

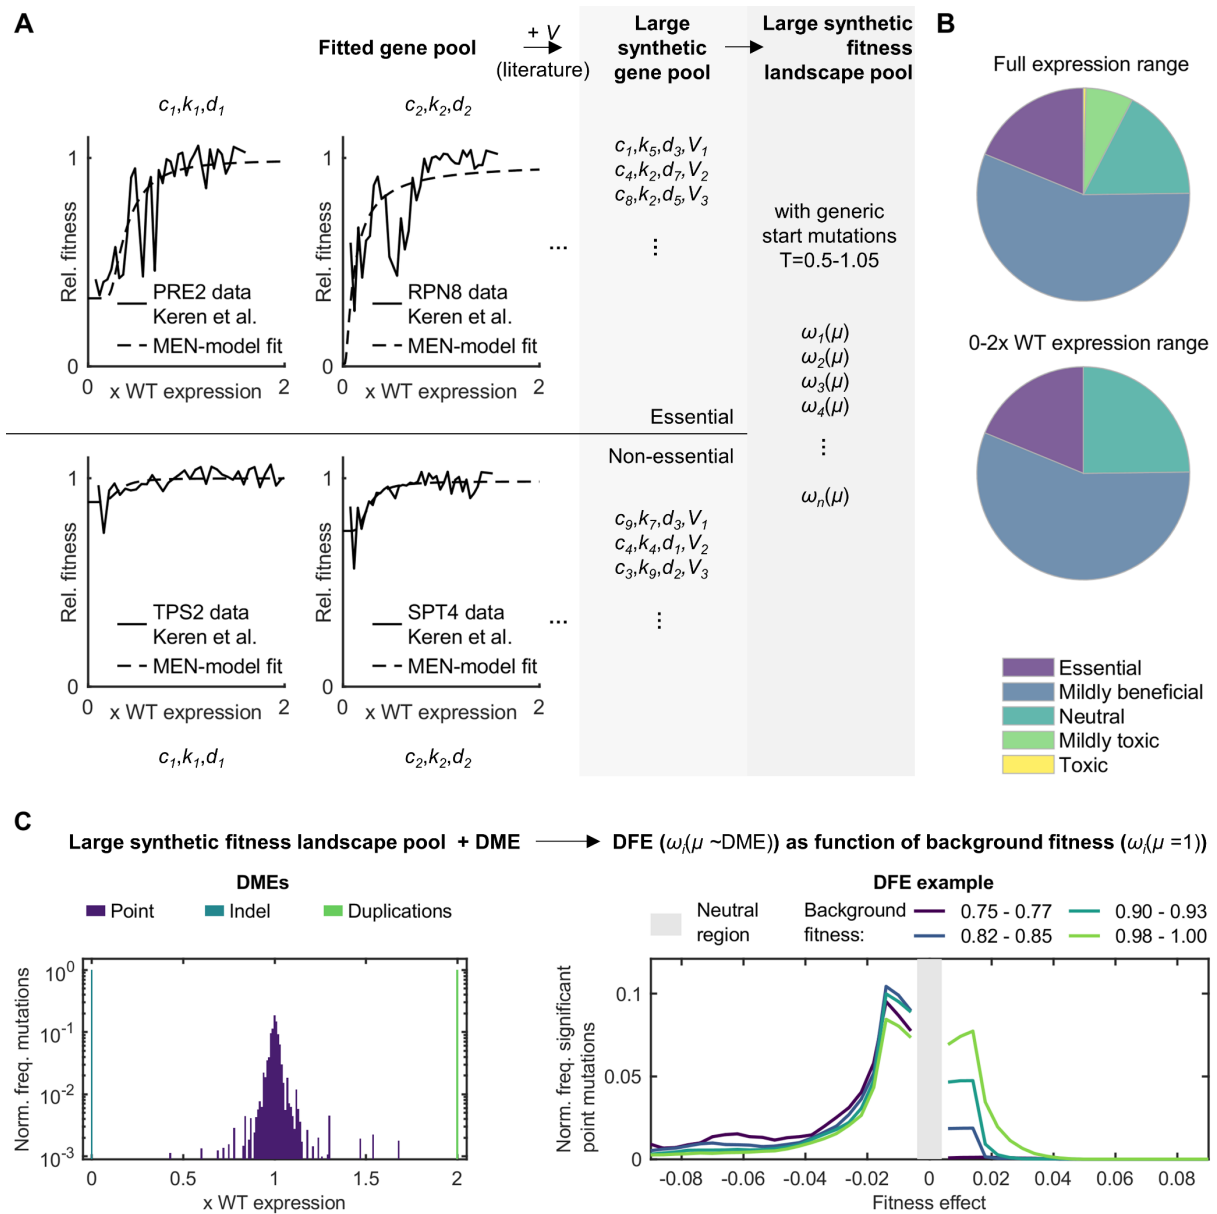

754

755 **Figure 3-figure supplement 1 Workflow for generating modelled distribution of fitness effects (DFE)**

756 **from MEN-model fits of literature fitness landscapes. (A) Construction of the large simulated gene**

757 **pool with corresponding fitness landscapes, based on MEN-model fits of landscapes of (Keren et al.,**

758 **2016) (with expression scaling from (Kulak et al., 2014)) and noise levels from (Chong et al., 2015).**

759 **Displayed empirical fitness landscape examples are selected for good coverage across 0 to 2 WT**

760 **expression levels for instructive purposes. This panel uses the mean progeny per cycle as fitness**

761 **definition as in (Keren et al., 2016) instead of Equation 3. (B) Fractions of simulated fitness**

762 **landscapes in the categories: essential (zero fitness at zero expression), mildly beneficial (viable**

763 across expression range, but better at high expression, with fitness rise  $> 0.05$ ), neutral (maximum  
764 fitness differences across expression range  $< 0.05$ ), mildly toxic (viable across expression range, but  
765 better at low expression, with fitness rise  $> 0.05$ ) and toxic (inviable at high expression). (C)  
766 Construction of the DFEs as function of background fitness using the distribution of mutational  
767 effects on expression (DME) for promoter mutations re-analyzed from (Hodgins-Davis et al., 2019a,  
768 2019b). Neutral (fitness effect  $< 4e-3$  as a proxy for non-significance based on the experimental  
769 resolution in (Johnson, Martsul, Kryazhimskiy, & Desai, 2019)) and non-viable mutations are  
770 removed from the DFE, which is smoothed only here for visualization. Background fitness values  
771 are binned, ranging from 0.75 to 1.05.

772

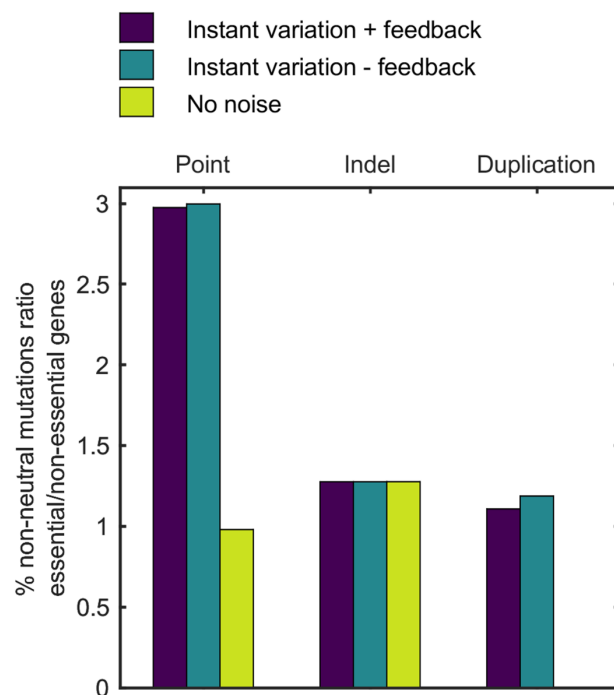

773

774 **Figure 3-figure supplement 2 Influence of essentiality on mutational effects. Bars represent the ratio**  
775 **between the percentage of non-neutral mutations in essential and non-essential genes, for**  
776 **simulated point mutations, indels and duplications as in Figure 3.**

777

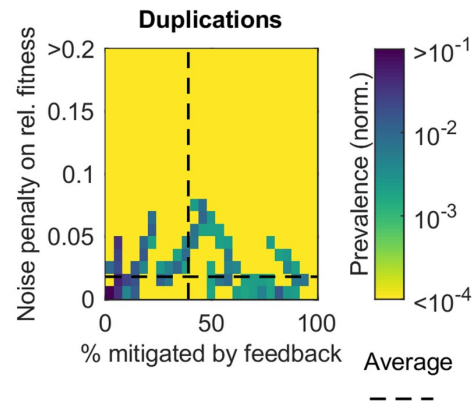

778

779 **Figure 5-figure supplement 1 Effects of noise and feedback on mutational returns of duplications.**

780 **The heat map denotes the frequency (color coded) of non-neutral duplications with a fitness penalty**

781 **associated to instant variation by expression noise and a certain mitigation level of feedback. Dashed**

782 **line denotes average values. The same duplication DFE is considered as in Figure 3.**

783

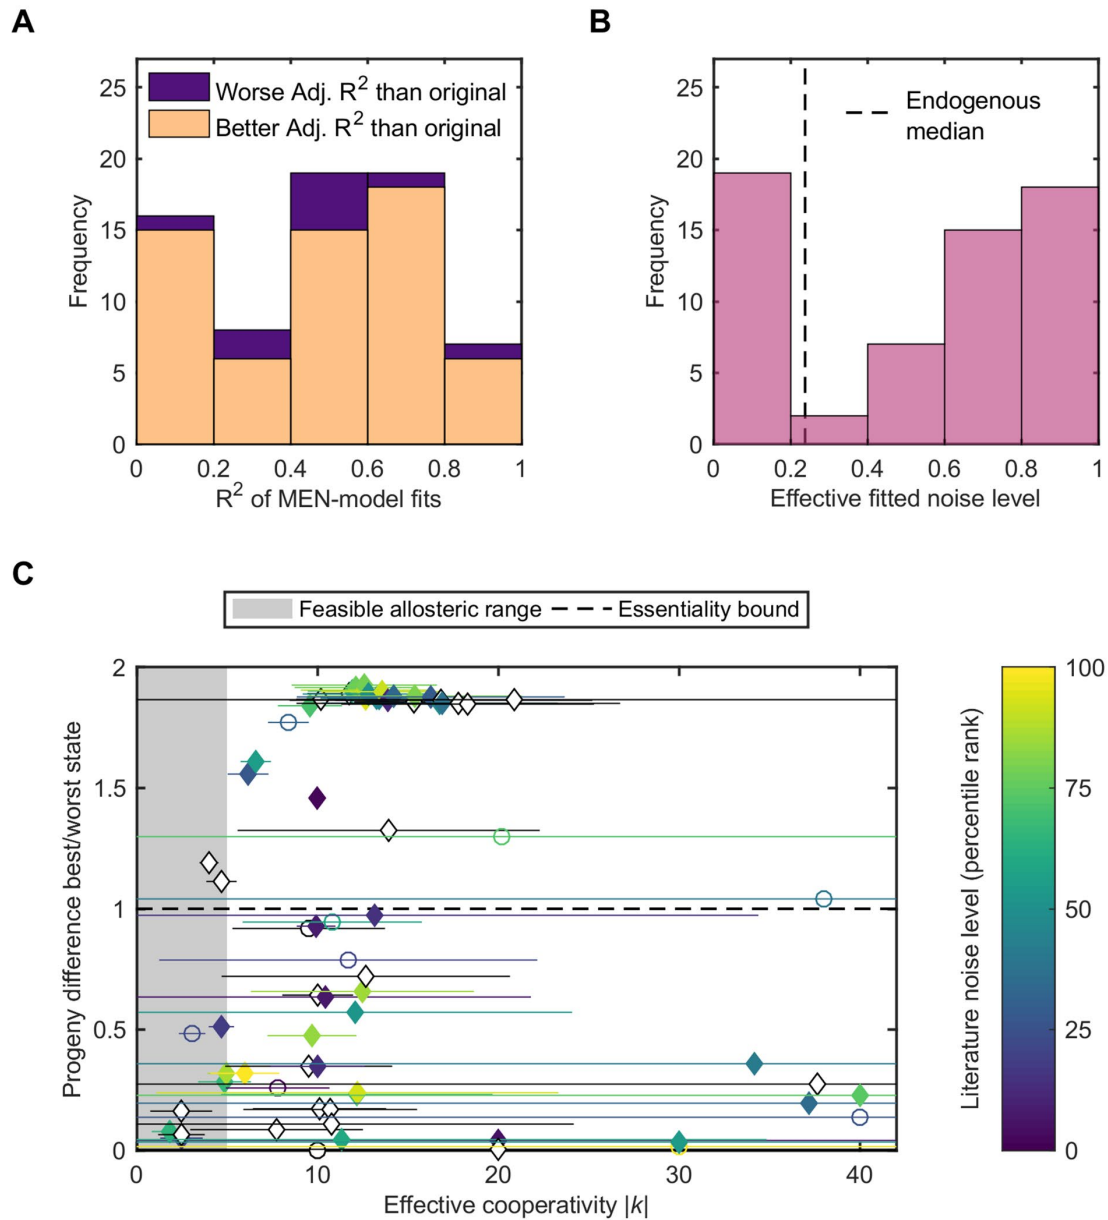

784

785 **Appendix 1-figure 1 MEN-model validation and assessment of fitted fitness landscapes.** (A) Goodness  
 786 of fit of the MEN-model compared to the original fits of (Keren et al., 2016) on the associated fitness  
 787 landscapes. (B) MEN-model fit estimate of the effective noise of all promoters combined from the  
 788 landscapes for which the MEN-model improves the fits and noise level (coefficient of variation)  
 789 estimates of (Chong et al., 2015) are available. (C) Fitness drop between states plotted against the  
 790 parameter  $k$ , color coded with the literature noise values (Chong et al., 2015) (converted to ranks).  
 791 No color for marker filling is given when for this gene no noise estimate was available (then only



792 **black edges and error bars, 67% confidence intervals) or when the model fit is worse than the**  
 793 **original.**

794

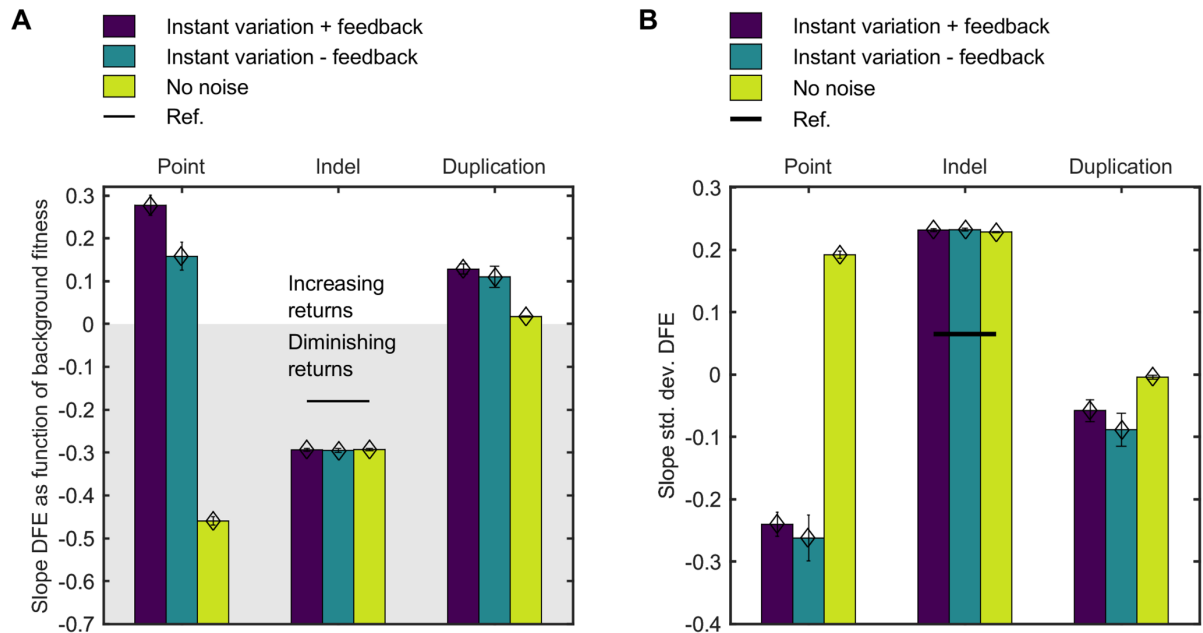

795

796 **Appendix 1-figure 2 Effects on noise on the mean and standard deviation of the DFE. Fits are**  
 797 **performed on the standard deviations of simulated DFEs as function of background fitness, with**  
 798 **instant variation and feedback, instant variation alone and without noise. Positive slopes represent**  
 799 **increasing returns (A) or noisier (B) returns as background fitness increases. Fits follow from**  
 800 **weighted least squares (WLS) on the mean or standard deviation bootstrapped per 0.025**  
 801 **background fitness bin, with weights as the reciprocal of the variance of the bootstrap values. DFEs**  
 802 **and DMEs considered are for the point mutations, indels and duplications as in Figure 3, only**  
 803 **disregarding lethal mutations for more appropriate comparison to the experimental reference value**  
 804 **from (Johnson et al., 2019), relevant for indel DFEs.**

805

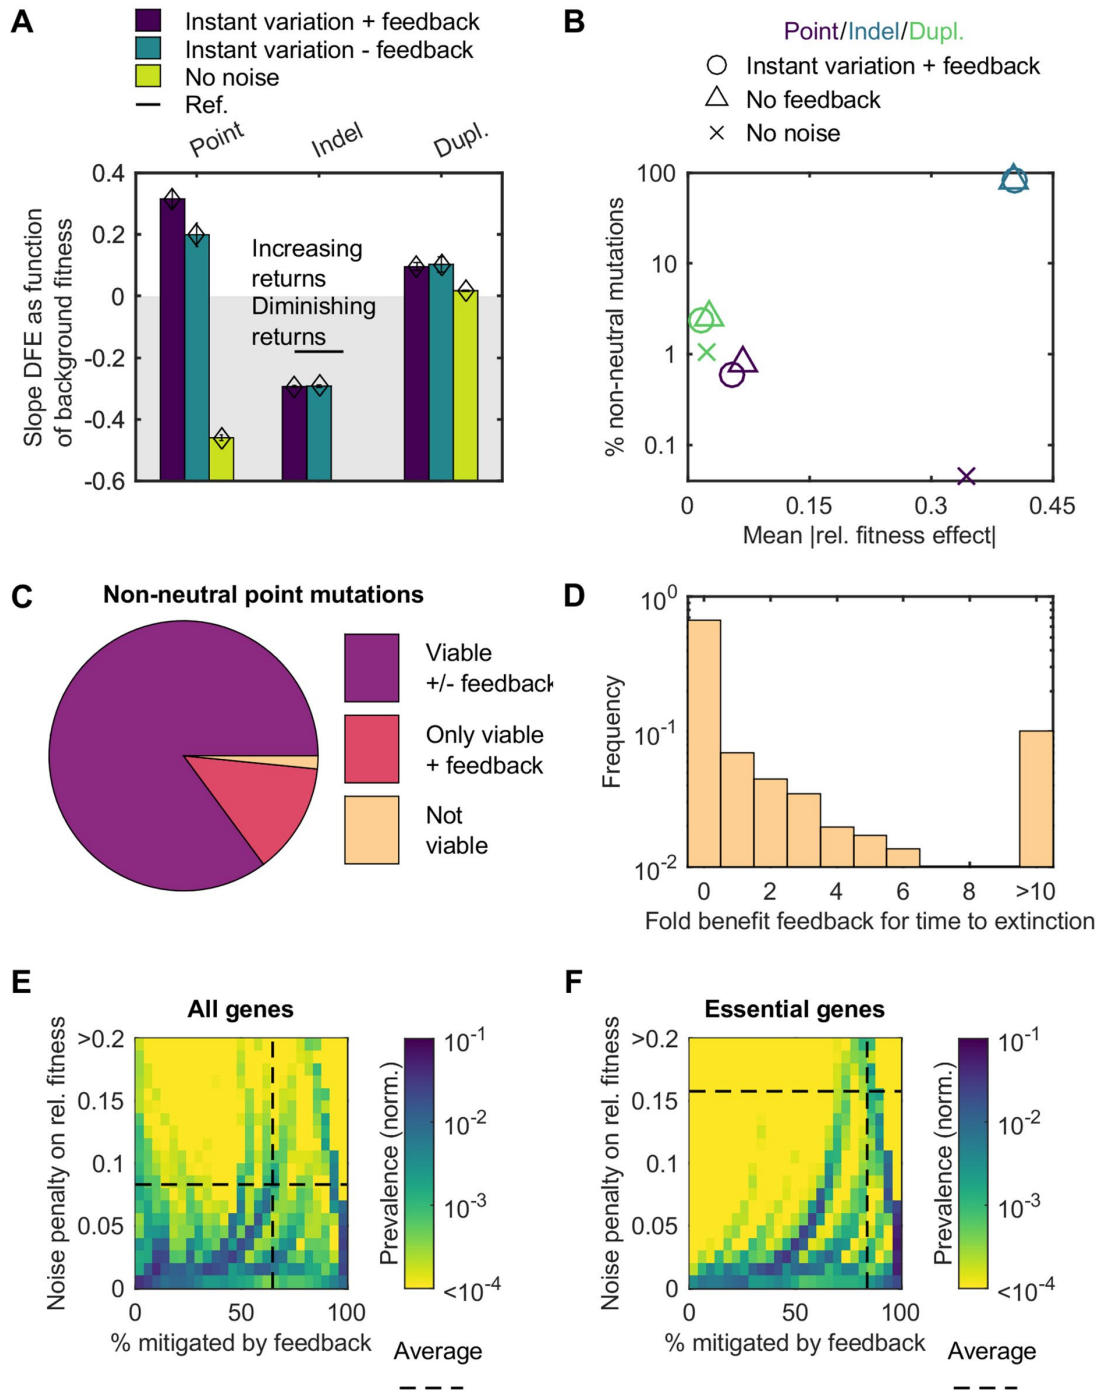

806

807 **Appendix 1-figure 3 Effects of noise on mutational returns when assuming linear scaling between**  
 808 **log noise level and log expression ( $\log V / \log \mu = -0.27$ ) mimicking observations in the low expression**  
 809 **regime from (Keren et al., 2015). Mutational pool is 500 instead of 5000 genes, but otherwise no**  
 810 **changes are made in the workflow compared to Appendix 1-figure 2A (for panel A) and Figure 3**  
 811 **(other panels). (A) Fits on the mean of simulated DFEs as function of background fitness, with instant**  
 812 **variation alone, with instant variation and feedback, and without noise. Negative mean slopes**

813 represent diminishing returns. Fits follow from weighted least squares (WLS) on the mean  
814 bootstrapped per 0.025 background fitness bin, with weights as the reciprocal of the variance of the  
815 bootstrap values. (B) Percentage of non-neutral mutations in the DFEs for the DMEs considered.  
816 Marker symbols denote the case with instant variation and feedback, only instant variation and no  
817 noise. (C) Division of effects of feedback on viability for non-neutral point mutations. (D) Generations  
818 to extinction for non-neutral point mutations when the colony is not structurally viable despite  
819 feedback. (E) Heat map denoting the frequency (color coded) of non-neutral point mutations with a  
820 fitness penalty associated to instant variation by expression noise and a certain mitigation level of  
821 feedback. Dashed line denotes average values. (F) The same plot as in (E), only for essential genes.

822

## 823 Appendix

### 824 Model implementation details

825 For our model, we assume a constant size for all cells, and hence no dilution. We turned to data from  
826 (Chong et al., 2015), where many proteins in yeast were tagged with GFP such that the protein  
827 distribution across the population could be determined. By examining the coefficients of variation,  
828 which we define as noise level  $V$ , we get an indication on whether the noise levels on gene products  
829 are gene specific or have common noise sources, such as dilution. The floor value of  $V$ , which links to  
830 the common sources is 0.1, while the typical  $V$  (median) is 0.2. Using a crude root-mean-square  
831 decomposition of  $V$  suggests the common sources as dilution are typically only responsible for 25% of  
832 the noise, so idiosyncratic noise contributions dominate.

833 Additionally, we assume no degradation of proteins. To see how stringent this assumption is, we  
834 assessed the degradation in several model systems. In *E. coli*, there is no noticeable degradation for 93  
835 to 98% of the proteome (Nagar et al., 2021). In *Schizosaccharomyces pombe* and *S. cerevisiae*,  
836 degradation is not a factor for protein abundance for around 85% of the proteins (Christiano, Nagaraj,

837 Fröhlich, & Walther, 2014). Finally, we note that for *C. elegans*, the generation time for the  
838 multicellular organism is on the scale of the typical protein half-life (Dhondt et al., 2017; Muschiol,  
839 Schroeder, & Traunspurger, 2009). This suggests that protein degradation is important for roughly half  
840 the proteins. In conclusion, explicitly ignoring degradation is inconsequential for the standard microbes  
841 but may become a factor for higher order organisms.

842 Furthermore, we simplify protein states to two discrete states to maximize analytical tractability. The  
843 rationale is that the effect of stochasticity in the model is already incorporated as soon as there is more  
844 than one state. Moreover, as shown further on most empirical fitness landscapes of (Keren et al., 2016)  
845 are consistent with one or two protein states with distinct progeny levels (see Appendix 1-figure 1A).  
846 The natural concentration scale that we can use to define the states is the tipping point concentration  
847  $c$  in the Hill progeny curve from Equation 1. Ideally, we define the state symmetrically around  $c$  and as  
848 equally spaces as possible. However, the halving of the concentrations upon generating the progeny  
849 and the need to revert to the same states every cycle limits our choice of binning. As a compromise,  
850 we set our high and low state to  $X=2c/3$  and  $X=0$  respectively before protein production and to  $X=4c/3$   
851 and  $X=2c/3$  respectively after production. The relevant progeny, after production, is then the Hill curve  
852 from Equation 1 evaluated at  $X=4c/3$  and  $X=2c/3$ , so for the high and low state  $g_h$  and  $g_l$  respectively:

$$\begin{cases} g_h \equiv g(4c/3) = d + \frac{2-d}{1+(4/3)^{-k}} \\ g_l \equiv g(2c/3) = d + \frac{2-d}{1+(2/3)^{-k}} \end{cases} \quad (\text{SI.1})$$

853 Sometimes, the progeny-protein scaling assumption can be justified from the bottom-up, such as in  
854 the case of polarity establishment in *S. cerevisiae*. There, polarity success, which is essential for cell  
855 division, depends in an almost binary fashion on Cdc42p concentration (Brauns et al., 2020). In such a  
856 case, the progeny function also classifies as a mesotype (Daalman, Sweep, & Laan, 2021).

857 Due to the stochastic protein production of  $X$ , a cell can switch between protein occupancy state with  
858 every cycle. We define the cumulative distribution function (cdf) for random variable  $x$ , the added

859 protein per cycle, as  $F_e(x; \mu, V)$ , with  $\mu$  as the average production per cycle and  $V$  as the coefficient of  
860 variation, or noise level, of the protein production per cycle. We only consider the probability values  
861 of the two state transitions from the high state (before production) to the low state or low state to low  
862 state, which can be defined as  $F_l$  and  $F_h$  respectively. This is because the other two transitions simply  
863 follow from noting the probability to end in any state starting from the high (or low) state is trivially 1.  
864 To end in the low state from the high state (at  $X=2c/3$ ), the production  $x$  may not exceed  $2c/3$ ,  
865 otherwise the total ends in the high bin again (at  $X=4c/3$ ). Similarly, to end in the low state from the  
866 low state (at  $X=0$ ), the production  $x$  may not exceed  $4c/3$ , otherwise the total ends in the high bin again  
867 (at  $X=4c/3$ ). Therefore, the probabilities  $F_h$  and  $F_l$  are given by:

$$\begin{cases} P(x \leq 2c/3) = F_e(2c/3; \mu, V) \equiv F_l \\ P(x \leq 4c/3) = F_e(4c/3; \mu, V) \equiv F_h \end{cases} \quad (\text{SI.2})$$

868 where the mean  $\mu$  depends implicitly on the cycle time; if the cycle time is longer, the mean increases  
869 and the probabilities to reach the high state after production are higher.

870 Concretely, the precise values of  $F_h$  and  $F_l$  depend on the choice of the distribution for the cdf. Figure  
871 1-figure supplement 1 shows the cdfs for five different choices, including the gamma cdf, which is a  
872 sensible choice for modeling the production. A gamma distribution follows from adding exponential  
873 random variables, the latter being suitable to model protein numbers from expression bursts (see  
874 (Friedman, Cai, & Xie, 2006), motivated therein by experiments in references (Cai, Friedman, & Xie,  
875 2006; J. Yu, Xiao, Ren, Lao, & Xie, 2006)). In short, we see that fixing the first two moments of the  
876 distribution is rather restrictive for the precise values of  $F_h$  and  $F_l$ , even for unbiological choices for the  
877 protein production cdf (such as a triangular cdf), except for the Pareto distribution. Therefore, our  
878 model results are not sensitive to the choice of cdf, unless the real distribution of the protein  
879 expression bursts are very far from expectation.

880

881

882 MEN-model fitness comparison with literature

883 After  $n$  generations, the number of cells in each protein state is given by:

$$\begin{bmatrix} f_h \\ f_l \end{bmatrix} \Big|_{t=nT} = M^n f|_{t=0} \quad (\text{SI.3})$$

884 If we decompose the initial state  $f|_{t=0}$  into the eigenvectors  $v_1$  and  $v_2$  of  $M$  (with appropriate weights

885  $a_1$  and  $a_2$ , and  $\lambda_1$  and  $\lambda_2$  as the respective eigenvalues with  $\lambda_1 \geq \lambda_2$ ), then we have:

$$\begin{bmatrix} f_h \\ f_l \end{bmatrix} \Big|_{t=nT} = M^n (a_1 v_1 + a_2 v_2) = a_1 \lambda_1^n v_1 + a_2 \lambda_2^n v_2 \quad (\text{SI.4})$$

886 After sufficient generations, only the term with the largest eigenvalue remains, so:

$$\begin{bmatrix} f_h \\ f_l \end{bmatrix} \Big|_{t=nT} = a_1 \lambda_1^n v_1 = \lambda_1^{t/T} a_1 v_1 = 2^{\log_2(\lambda_{max}) t/T} a_1 v_1 \quad (\text{SI.5})$$

887 From this expression, we note the time to double the state occupancy is  $T/\log_2(\lambda_{max})$ , so the fitness,

888 which is the reciprocal of this time, becomes  $\omega = \log_2(\lambda_{max})/T$ , the expression in equation 3.

889 We can write the eigenvalues, of which we need the largest one for equation 3, as:

$$Mf|_{t=\infty} = \lambda f|_{t=\infty} \Rightarrow (M - \lambda I)f|_{t=\infty} = 0 \quad (\text{SI.6})$$

890 This is routinely solved by setting  $\det(M - \lambda I) = 0$ , which for a 2x2 system reduces to:

$$\det(M) - \text{tr}(M)\lambda + \lambda^2 = 0 \Rightarrow \lambda = \frac{\text{tr}(M) \pm \sqrt{\text{tr}(M)^2 - 4 \det(M)}}{2} \quad (\text{SI.7})$$

891 The determinant can be written as:

$$\det(M) = g_l g_h F_h (1 - F_l) - g_l g_h F_l (1 - F_h) \quad (\text{SI.8})$$

892 Generally, the first term is larger than the second, as  $F_h > F_l$  and thus also  $1 - F_l > 1 - F_h$ . Assuming  
893 relatively low noise levels (e.g. those found in *S. cerevisiae* where the median value is 0.2 (Chong et al.,  
894 2015)), we can state  $F_h \gg F_l$  and  $1 - F_l \gg 1 - F_h$ , and then we can approximate the determinant as

$$\det(M) \approx g_l g_h F_h (1 - F_l) \quad (\text{SI.9})$$

895 The largest eigenvalue is then:

$$\begin{aligned} 896 \quad \lambda_{max} &\approx \frac{(g_h(1 - F_l) + g_l F_h) + \sqrt{(g_h(1 - F_l) + g_l F_h)^2 - 4g_l g_h(1 - F_l)F_h}}{2} \\ &= \frac{(g_h(1 - F_l) + g_l F_h) + |g_h(1 - F_l) - g_l F_h|}{2} = \max(g_h(1 - F_l), g_l F_h) \quad (\text{SI.10}) \end{aligned}$$

897 Combining this result with equation 3 yields equation SI.11, provided that there is sustainable growth  
898 to define fitness ( $\omega_r > 0$ ):

$$\omega_r = \omega T = \log_2 \lambda_{max} = \log_2 \max(g_h(1 - F_l), g_l F_h, 1) \quad (\text{SI.11})$$

899 Interestingly, we note a corollary with the fit function in (Keren et al., 2016), which the authors  
900 employed to fit their empirical fitness landscapes. Their fit function consists of a product of two  
901 sigmoids (from (Chechik et al., 2008)), fitting a fitness which they defined as the number of progeny  
902 compared to WT, equating to  $\lambda_{max}/2$  in our model. We see in our expression for  $\lambda_{max}$  the contours of  
903 the product of two sigmoids,  $g$  and  $F$ , only this time motivated from the bottom-up, and incidentally,  
904 with three free parameters less (4 instead of 7). While the double sigmoid worked well for authors of  
905 (Keren et al., 2016) on their fitness landscapes, our model construction provides the insight why their  
906 fit function worked so well.

907

908 Strict non-negativity of transgenerational feedback effect on fitness

909 Given suppression of feedback effectively resets the state vector  $f$  to the same value at every iteration,  
910 the state equation 2 can be modified for the absence of transgenerational feedback as:

911 The state equation for the case when feedback is suppressed can be written as:

$$912 \quad \begin{bmatrix} f_h \\ f_l \end{bmatrix} \Big|_{t=T} = \begin{bmatrix} g_h(1-F_l) & g_h(1-F_h) \\ g_l F_l & g_l F_h \end{bmatrix} \begin{bmatrix} f_{h,reset} \\ f_{l,reset} \end{bmatrix} \Big|_{t=0} = M f_{reset}$$

913 We define the  $f_{reset}$  as the state vector in equilibrium when there is no selection, so when  $g_h=g_l=2$ . In  
914 that case,  $\lambda_{max}=2$  as all cells produce two daughter cells:

$$915 \quad \begin{bmatrix} 2(1-F_l) & 2(1-F_h) \\ 2F_l & 2F_h \end{bmatrix} f|_{t=\infty} = \lambda f|_{t=\infty} \Rightarrow \begin{bmatrix} 1-F_l & 1-F_h \\ F_l & F_h \end{bmatrix} \begin{bmatrix} f_{h,reset} \\ f_{l,reset} \end{bmatrix} = \begin{bmatrix} f_{h,reset} \\ f_{l,reset} \end{bmatrix}$$

$$916 \quad \Rightarrow (1-F_l)f_{h,reset} + (1-F_h)f_{l,reset} = f_{h,reset} \Rightarrow (1-F_h)f_{l,reset} = F_l f_{h,reset}$$

$$917 \quad \Rightarrow \frac{f_{h,reset}}{f_{l,reset}} = \frac{1-F_h}{F_l}$$

918 Then, analogously to the eigenvalue in the case of the standard MEN-model, we write the growth of  
919 the total population per generation in the case of feedback suppression:

$$920 \quad \Rightarrow \frac{f_h|_{t=T} + f_l|_{t=T}}{f_{h,reset} + f_{l,reset}} = \frac{g_h(1-F_l)(1-F_h) + g_h(1-F_h)F_l + g_l F_l(1-F_h) + g_l F_h F_l}{1-F_h + F_l}$$

$$\lambda_{-feedback} = \frac{g_h - g_h F_h + g_l F_l}{1 - F_h + F_l} \quad (SI.12)$$

921 We compare this to the growth (eigenvalue) in the standard MEN-model case (including feedback):

$$922 \quad \lambda = \frac{tr(M) \pm \sqrt{tr(M)^2 - 4 \det(M)}}{2}$$

923 We can show that this  $\lambda$  is always at least as large as  $(g_h - g_h F_h + g_l F_l)/(1 - F_h + F_l)$ . In that case,  
924 the following identity must hold:



$$925 \quad \frac{\text{tr}(M) + \sqrt{\text{tr}(M)^2 - 4 \det(M)}}{2} \geq \frac{g_h - g_h F_h + g_l F_l}{1 - F_h + F_l}$$

$$926 \quad \Rightarrow \sqrt{\text{tr}(M)^2 - 4 \det(M)} \geq \left( 2 \frac{g_h - g_h F_h + g_l F_l}{1 - F_h + F_l} - \text{tr}(M) \right)$$

927 The left-hand side must be larger than zero, as  $\lambda$  must be real. If  $2 \frac{g_h - g_h F_h + g_l F_l}{1 - F_h + F_l} - \text{tr}(M) \leq 0$ , then

928 the identity holds. When  $2 \frac{g_h - g_h F_h + g_l F_l}{1 - F_h + F_l} - \text{tr}(M) > 0$ , it is not immediately clear the identity holds.

929 We need to check this case, where we can square both sides of the identity without flipping the  $\geq$

930 sign:

$$931 \quad \text{tr}(M)^2 - 4 \det(M) - \left( 2 \frac{g_h - g_h F_h + g_l F_l}{1 - F_h + F_l} - \text{tr}(M) \right)^2 \geq 0$$

$$932 \quad g_h g_l (F_l - F_h) - \left( \frac{g_h - g_h F_h + g_l F_l}{1 - F_h + F_l} \right)^2 + \frac{g_h - g_h F_h + g_l F_l}{1 - F_h + F_l} (g_h - g_h F_l + g_l F_h) \geq 0$$

933 Placing terms under the same denominator:

$$934 \quad \frac{g_h g_l (F_l - F_h) (1 - F_h + F_l)^2 - (g_h - g_h F_h + g_l F_l)^2 + (g_h - g_h F_h + g_l F_l) (g_h - g_h F_l + g_l F_h) (1 - F_h + F_l)}{(1 - F_h + F_l)^2}$$

$$935 \quad \geq 0$$

936 When analyzing first the numerator alone, we see many terms cancel out:

$$937 \quad g_h g_l F_l + g_h g_l F_l F_h^2 + g_h g_l F_l^3 - 2 g_h g_l F_l F_h + 2 g_h g_l F_l^2 - 2 g_h g_l F_l^2 F_h - g_h g_l F_h - g_h g_l F_h^3$$

$$938 \quad - g_h g_l F_l^2 F_h + 2 g_h g_l F_h^2 - 2 g_h g_l F_l F_h + 2 g_h g_l F_l F_h^2 - g_h^2 - g_h^2 F_h^2 - g_l^2 F_l^2 + 2 g_h^2 F_h - 2 g_h g_l F_l$$

$$939 \quad + 2 g_h g_l F_l F_h + g_h^2 - g_h^2 F_l + g_h g_l F_h - g_h^2 F_h + g_h^2 F_h F_l - g_h g_l F_h^2 + g_l g_h F_l - g_l g_h F_l^2 + g_l^2 F_l F_h$$

$$940 \quad - g_h^2 F_h + g_h^2 F_l F_h - g_h g_l F_h^2 + g_h^2 F_h^2 - g_h^2 F_h^2 F_l + g_h g_l F_h^3 - g_l g_h F_h F_l + g_l g_h F_h F_l^2 - g_l^2 F_l F_h^2 + g_h^2 F_l$$

$$941 \quad - g_h^2 F_l^2 + g_h g_l F_h F_l - g_h^2 F_h F_l + g_h^2 F_h F_l^2 - g_h g_l F_h^2 F_l + g_l g_h F_l^2 - g_l g_h F_l^3 + g_l^2 F_l^2 F_h$$

$$942 \quad = 2 g_h g_l F_l F_h^2 - 2 g_h g_l F_l F_h + 2 g_h g_l F_l^2 - 2 g_h g_l F_l^2 F_h - g_l^2 F_l^2 + g_h^2 F_h F_l + g_l^2 F_l F_h - g_h^2 F_h^2 F_l$$

$$\begin{aligned}
 & -g_l^2 F_l F_h^2 - g_h^2 F_l^2 + g_h^2 F_h F_l^2 + g_l^2 F_l^2 F_h \\
 & = F_l (2g_h g_l F_h^2 - 2g_h g_l F_h + 2g_h g_l F_l - 2g_h g_l F_l F_h - g_l^2 F_l + g_h^2 F_h + g_l^2 F_h - g_h^2 F_h^2 - g_l^2 F_h^2 - g_h^2 F_l \\
 & \quad + g_h^2 F_h F_l + g_l^2 F_l F_h) \\
 & = F_l (F_h - F_l) (2g_h g_l F_h - 2g_h g_l + g_l^2 - g_l^2 F_h + g_h^2 - g_h^2 F_h) \\
 & = F_l (F_h - F_l) (1 - F_h) (g_h^2 - 2g_h g_l + g_l^2) = F_l (F_h - F_l) (1 - F_h) (g_h - g_l)^2
 \end{aligned}$$

948 The identity to prove thus reduces to:

$$\frac{F_l (F_h - F_l) (1 - F_h) (g_h - g_l)^2}{(1 - F_h + F_l)^2} \geq 0$$

950 We can see this will always hold, as  $F_h > F_l > 0$ . The equality is only obtained when the progeny  
 951 landscape is flat ( $g_l = g_h$ ) or when there is no noise ( $F_l = F_h$ ), or at least effectively no noise to use  
 952 for switching of states ( $F_l = 0$  or  $1 - F_h = 0$ ).

953

## 954 Theoretical fitness landscapes

955 Figure 2 demonstrated the fitness landscapes for the two extreme cases of an essential and toxic gene.  
 956 However, many genes fall in between these two cases (Figure 3-figure supplement 1B). Therefore,  
 957 Figure 2-figure supplement 1 shows the fitness landscapes for mildly beneficial and mildly toxic genes,  
 958 and with and without transgenerational feedback. In any case, we see how noise smoothens the  
 959 landscape.

960 Additionally, to illustrate how the landscape is smoothed for realistic landscapes, we consider the  
 961 landscape sharpness that we typically encounter from MEN-model fits on empirical landscapes of  
 962 (Keren et al., 2016) (see Appendix 1-figure 1C). We define a width to represent the smoothing as the  
 963 expression range spanning 10% to 90% of the fitness transition between the worst and best state (see  
 964 in Figure 2-figure supplement 2A). This width will differ with and without feedback, and the ratio of

965 widths between these two scenarios is plotted in Figure 2-figure supplement 2B for the possible  
966 landscape profile range from essential to toxic.

967

## 968 [Evaluation MEN-model fits on empirical fitness landscapes](#)

969 The literature fitness landscapes of (Keren et al., 2016) as measured through an array of artificial  
970 promoters equate to the values of  $\lambda_{max}/2$  as a function of mean expression  $\mu$ . To avoid the problems  
971 with the negative values for fluorescence relating to WT expression in (Keren et al., 2016), we combine  
972 the empirical landscapes with WT protein numbers of (Kulak et al., 2014). Furthermore, we also add  
973 essentiality data from (Cherry et al., 2012). The MEN-model fits improve the original fits of (Keren et  
974 al., 2016) (metric  $R^2$ ) for 63% of the cases. Because our parsimonious approach only requires 4  
975 parameters (3 less than the original), adjusting our metric (Wherry, 1931) for this increase this  
976 percentages to 84% (see Fig. 2A). A similar percentage (85%) results from using the AIC (Akaike, 1974;  
977 Burnham & Anderson, 2004) as a metric.

978 The success of fitting fitness functions based on simple, sigmoidal progeny functions also seems in line  
979 with another study on a subset of these landscapes done in (Schmiedel, Carey, & Lehner, 2019), where  
980 a noise decomposition was also performed. There, authors demonstrate two recurrent noise-mean  
981 expression relation underlie most fitness landscapes. The essential/(mildly) beneficial and (mildly)  
982 toxic landscape types we describe in Figure 2 and Figure 2-figure supplement 1 are interpretable as  
983 the principal topologies authors describe. Together with the fit metrics, this inspires trust in our  
984 approach, and we proceed to generate our model prediction of a realistic epistatic pattern.

985 Because the decomposition of observed fitness landscapes allows the decomposition into the progeny  
986 function and the noise component, we can also pose a different perspective to the observation that  
987 sharp fitness landscapes have lower noise levels (Keren et al., 2016). Remarkably, combining the fitted  
988 progeny sharpness  $k$  with noise levels that natively correspond to the respective genes (Chong et al.,  
989 2015) does not show a significant correlation between the two (Spearman  $\rho = 0.08$  (p-value 0.59),

990 N=40, see also Appendix 1-figure 1C). This test only includes genes with a known noise level in (Chong  
991 et al., 2015). No change in conclusion (Spearman  $\rho = -0.003$  (p-value 0.99), N=24) follows by ignoring  
992 those  $k$  with large uncertainties (67% confidence interval  $> 10$ ), which are mainly caused by relatively  
993 flat progeny landscapes. This prompts the hypothesis that observing a sharp fitness landscape implies  
994 low noise, rather than selection necessarily sharpening the fitness landscape due to low noise.

995 Moreover, we note that when we aggregate the noise of synthetic promoters used in (Keren et al.,  
996 2016) into a single noise level parameter, fits on the associated landscapes indicate relative high noise  
997 (Appendix 1-figure 1B). Concretely, for these genes the median value is 0.68, almost three times as  
998 large compared to 0.24 of (Chong et al., 2015). While we stress this fit parameter indicate an effective  
999 noise with diverse contributions, this indicates care must be taken with direct interpretations of the  
1000 landscapes of (Keren et al., 2016). In particular, fitness costs of mutations that change noise level will  
1001 otherwise be overestimated, as signaled by (Schmiedel et al., 2019), possibly contributing to the  
1002 discrepancy discussed in the previous paragraph.

1003

#### 1004 [Construction of DFEs](#)

1005 The parameter pool of the MEN-model fits is transformed to a new pool to generate a synthetic  
1006 landscape pool (see Figure 3-figure supplement 1A). We removed the bias for essential genes (see  
1007 Figure 3-figure supplement 1B) and combine this with a distribution of mutational effects (Figure 3-  
1008 figure supplement 1C) as described in Simulation of representative DFEs. An example of such a DFE as  
1009 function of background fitness is found in Figure 3-figure supplement 1C.

1010

#### 1011 [Simulated DFE comparison to documented diminishing returns](#)

1012 To validate our simulated DFEs, we make use of the indel mutation type as our control. While removal  
1013 of noise is inconsequential for this type, literature is available for an experimental DFE in yeast

1014 (Johnson et al., 2019). This transposon insertion induced DFE should theoretically be fairly comparable  
1015 to our simulated indel DFE consisting of deletions of gene products. Yet, comparison with our  
1016 simulations requires some filtering on the mutations. Many mutations will be almost neutral to within  
1017 experimental resolution, In (Johnson et al., 2019), 64% of the mutations were deemed neutral, which  
1018 roughly means that measured relative fitness effects of at most 0.4% are considered as neutral, which  
1019 defines our neutrality threshold.

1020 We then compare the slope of the observed diminishing returns pattern, a negative slope in mean  
1021 mutational return as a function of background fitness. Because of the experimental design of (Johnson  
1022 et al., 2019), we also exclude lethal mutations from our DFE, but only for the analyses on DFE statistics  
1023 as a function of background fitness. Our slope of the mean fitness effect as function of background  
1024 fitness is -0.29 (see Appendix 1-figure 2A), in reasonable accordance with figure 2E in (Johnson et al.,  
1025 2019) where experimental slope for the mean is -0.18. By contrast, the slope in standard deviation of  
1026 the DFE is not so well fitted (see Appendix 1-figure 2B), and only the sign of the trend is correct.

1027

## 1028 [Supplemental DFE results](#)

1029 We had seen in Figure 3 that the feedback does not necessarily imply a larger non-neutral mutation  
1030 pool, even though this would have been possible theoretically (Figure 2). However, the landscape  
1031 smoothing is clearly more noticeable when comparing essential against non-essential genes, see Figure  
1032 3-figure supplement 2. There, we see for the different DFEs the effect of essential genes on the non-  
1033 neutral mutation pool. Again, the effect of feedback on the smoothing is not pronounced.

1034 Figure 5 had focused on the point mutations. Duplications are not lethal, only in a rare case without  
1035 feedback. Therefore, an analogous Figure 4 for duplication is not relevant, but an analogous Figure 5  
1036 is possible and shown in Figure 5-figure supplement 1.

1037 Incidentally, we note that empirically a negative correlation exists between (log) mean expression and  
1038 (log) noise level for certain expression levels (Bar-Even et al., 2006; Keren et al., 2015). Appendix 1-  
1039 figure 3 shows the equivalent of Figure 3, Figure 4 and Figure 5, taking into account this negative  
1040 correlation. However, we notice that this correlation has a negligible influence on our conclusions.  
1041 Therefore, we consider for simplicity mutations that only change expression in the main text.  
1042
